# Supplementary material for: Simultaneous Enhancement of Photocatalytic CH4 Conversion and H2O2 Production through Water Confinement in Nanoporous Core-Shell Catalysts
Source: Research Square preprint supplement (doi:10.21203/rs.3.rs-6469567/v1), 2025-06-20
Supplement: Supplementary file 1 [file 211ded878a389062712eb9ab.docx]

**Supplementary Information for**

**Simultaneous Enhancement of Photocatalytic CH4 Conversion and H2O2 Production through Water Confinement in Nanoporous Core-Shell Catalysts**

Fanxun Lv1, Xiaoyan Wu1, Xuan Wang1, Yi Yu1,2, Chenlu Xie1,2*

1 School of Physical Science and Technology, ShanghaiTech University, Shanghai, 201210, China

2 Shanghai Key Laboratory of High-Resolution Electron Microscopy, ShanghaiTech University, Shanghai, 201210, China

*Corresponding author: xiechl@shanghaitech.edu.cn

**Supplementary Materials and Methods**

**Materials**

All reagents were commercially obtained without purification. Titanium dioxide (P25), gold (III) chloride trihydrate, chloroplatinic acid, palladium chloride were purchased from Sigma Aldrich. Silver nitrate was purchased from Alfa Aeaser. Dodecyltrimethylammonium bromide (C12TAB), cetyltrimethylammonium bromide (C16TAB), tetraethyl silicate (TEOS), methanol, formaldehyde, acetic acid, ammonium acetate, deuterium water, H218O, coumarin, 7-hydroxycoumarin, potassium titanium oxalate, hydrogen peroxide (30 %), acetylacetone, benzoic acid, hydroxybenzoic acid, 5,5-dimethyl-1-pyrrolidinium N-oxide (DMPO) was purchased from Aladdin. Ammonia (ammonium hydroxide) (25-28%), formic acid, dimethyl sulfoxide, concentrated sulfuric acid (98%), hydrochloric acid (37%), nitric acid (65.0-68.0%) were purchased from Sinopharm Chemical Reagent Co., Ltd., China.

**Preparation of TiO2@pSiO2 and TiO2@pSiO2-Au**

The synthesis procedure for TiO2@pSiO2 was same as the synthesis of M/TiO2@pSiO2 except using TiO2 as the starting materials. The synthesis procedure for TiO2@pSiO2-Au was same as the synthesis of Au/TiO2, except using TiO2@pSiO2 as supporting materials.

**HCHO quantification**

The amount of HCHO was quantified using the acetylacetone color-development method1-3. Typically, 0.5 mL of the sample liquor, 2 mL of deionized water and 0.5 mL of reagent solution (consisting of 15 g of ammonium acetate, 0.3 mL of acetic acid, and 0.2 mL of acetylacetone dissolved in 100 mL H2O) were mixed and placed in a water bath at 35 ℃ for 40 minutes. The absorption value of the mixture at 412 nm was then measured using UV-visible absorption spectroscopy (PerkinElmer, Lambda 265).

**H2O2 quantification**

The concentration of produced H2O2 was determined using the titanium oxalate spectrophotometric method3. To prepare the test solution, 0.636 g of potassium titanium oxalate and 0.02 mL of concentrated sulfuric acid were dissolved in 99.98 mL of DI H2O. Then, 1 mL of the above test solution was mixed with 1 mL of the reaction sample. The absorption of the mixture was measured at 390 nm using UV-visible absorption spectroscopy (PerkinElmer, Lambda 265).

**CH4 conversion rates and oxygenates selectivity calculation**

The methane conversion and oxygenates selectivity in this process are calculated according to the following equations:

The initial methane amount in the system is calculated according to the following equation (V is the volume of the headspace of the reactor):

The apparent quantum yield (AQY) of CH4 conversion was calculated according to the following equation:

where *N(electrons)* and *N(photons)* represent the number of reacted electrons and the number of incident photons, respectively. *N(photons)* = IAt/E, where I, A, t and E represent incident light 𝜆 intensity (W/cm2), irradiation area (cm2), light incident time (s) and photo energy (J), respectively. For the calculation of N(electrons), we use the approach following the reported work4,5: *N(electrons)* = N(electrons) = n(CH3OOH) + 3n(CH3OH) + 5n(HCHO) + 7n(HCOOH) + 9n(CO2), where n(CH3OOH), n(CH3OH), n(HCHO), n(HCOOH) and n(CO2) represent the mole numbers of produced CH3OOH, CH3OH, HCHO, HCOOH and CO2, respectively.

**Catalyst cycling test**

To study the reusability of the catalyst, the solid catalyst was separated by centrifugation after each reaction run. The catalysts were re-used in the next run after drying at 90 °C overnight under vacuum and annealed at 300 ºC in air to remove any adsorbed organic species.

**Active species scavenging experiments**

The experiments were conducted by adding different types of radical scavengers was used to understand the role of radical species involved in the photocatalytic CH4 oxidation. Tetra-methylpiperidine N-oxide (TEMPO) as scavenger for all radicals, and ammonium oxalate (NH4)2C2O4), sodium iodate (NaIO3), salicylic acid (HOC6H4COOH) as scavengers for photogenerated holes, photogenerated electrons, hydroxyl radicals, respectively6.

In a typical experiment, 10 mg photocatalyst was dispersed in 100 mL distilled water containing 1 mmol radical scavengers. After finely sealed, the suspension was purged with ultrapure Ar (99.999%) for 20 min to completely remove air. Then O2 (99.999%) and CH4 (99.999 %) were injected to acquire the desired pressure. The reaction was conducted for 10 mins. Products including CH3OH, CH3OOH, HCHO, HCOOH and CO2 were measured according to the method shown above.

**
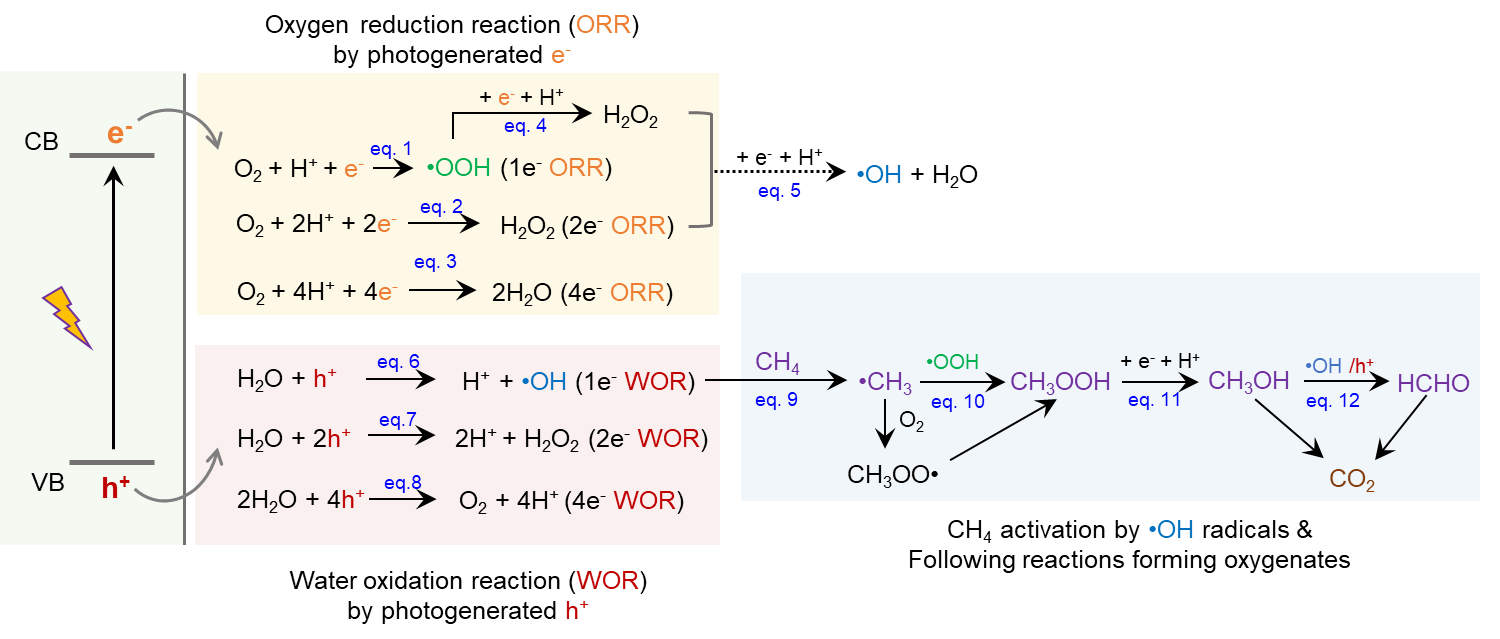
**

**Supplementary Scheme 1.** **Schematic illustration of the complex electron and proton transfer steps in the photocatalytic CH4 oxidation process.** This process generates various reactive oxygen species (ROS) including •OH, •OOH and H2O2.

**Note:** In our system of Au/TiO2@pSiO2, the ROS generation process involves a 2e- ORR and a 1e- WOR, resulting in the formation of •OH radicals and H2O2.


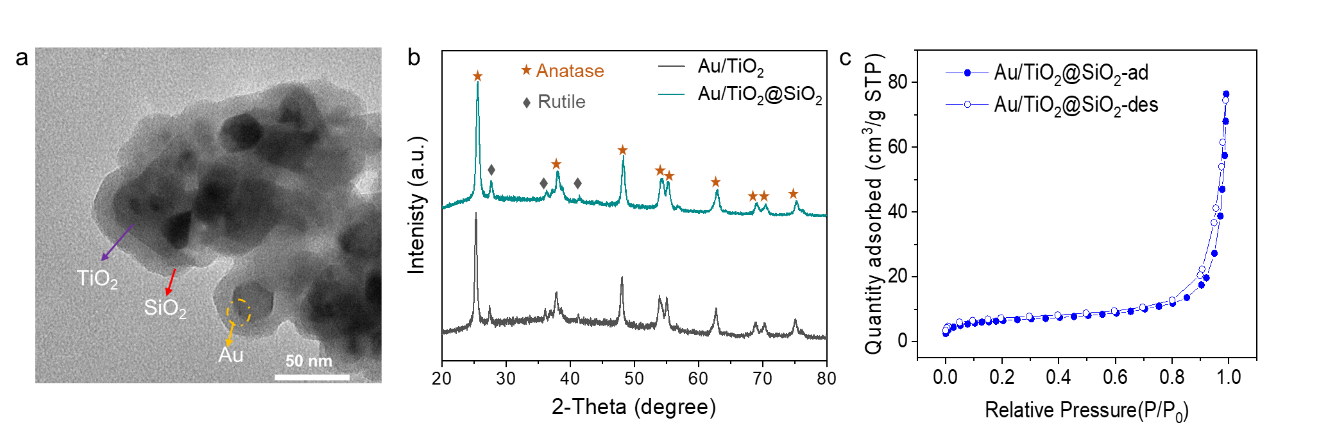


**Supplementary Fig. 1. Structure characterization of Au/TiO2@SiO2.****a**, TEM image of Au/TiO2@SiO2. **b**, XRD pattern of as-synthesized Au/TiO2@SiO2. **c**, N2 adsorption isotherm of Au/TiO2@SiO2.The surface area of Au/TiO2@SiO2 measured by Brunauer–Emmett–Teller (BET) method is 20.74 m2/g.


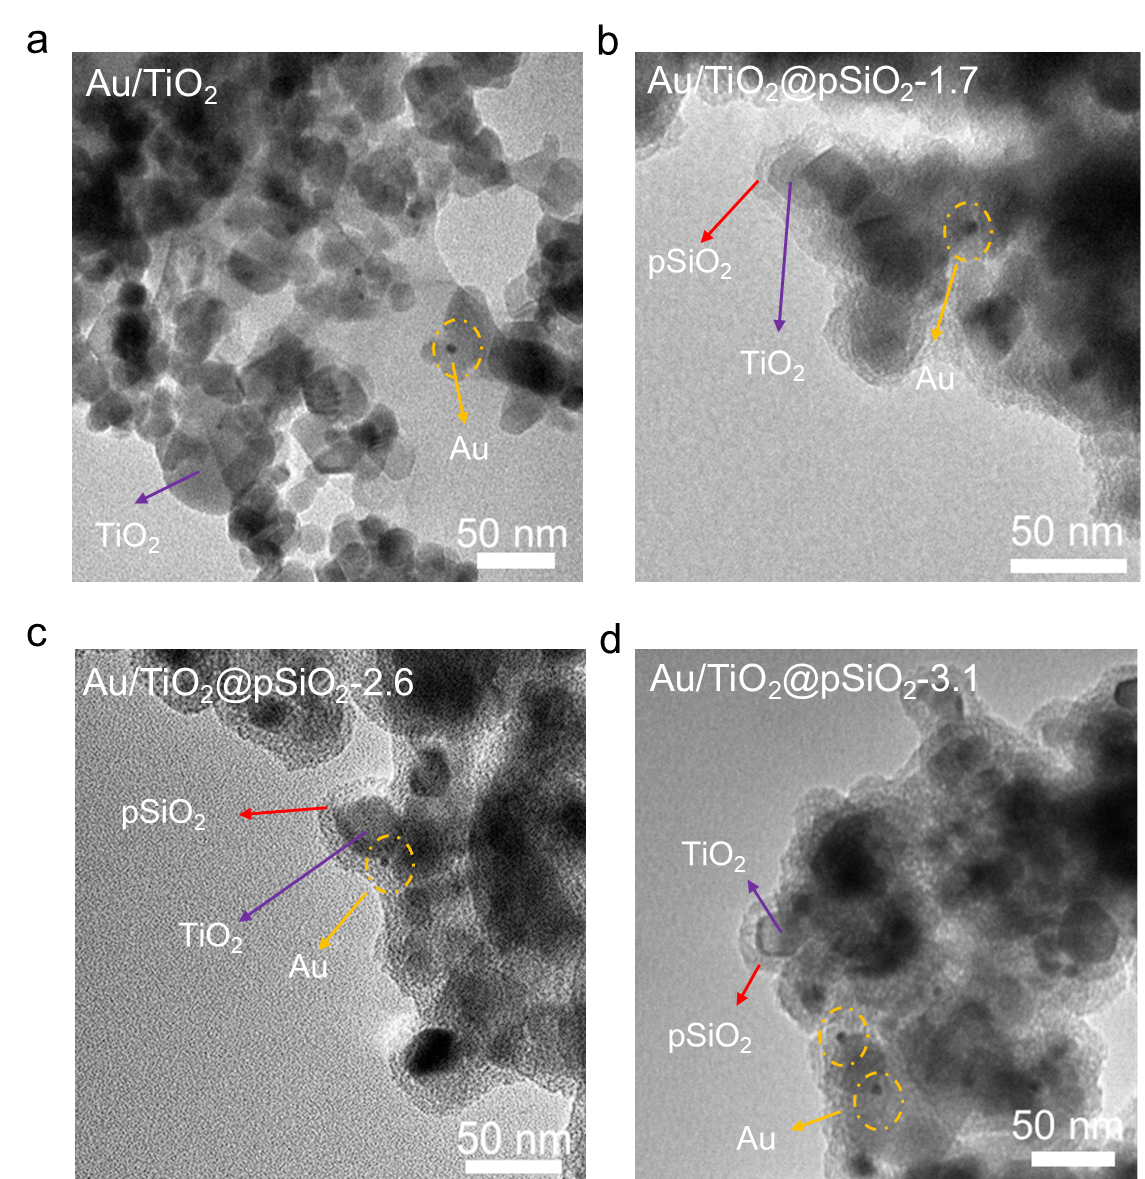


**Supplementary Fig. 2**. **TEM characterization of photocatalysts**. **a**, TEM image of Au/TiO2. **b**, TEM image of Au/TiO2@pSiO2-1.7. **c**, TEM image of Au/TiO2@pSiO2-2.6. **d**, TEM image of Au/TiO2@pSiO2-3.1.


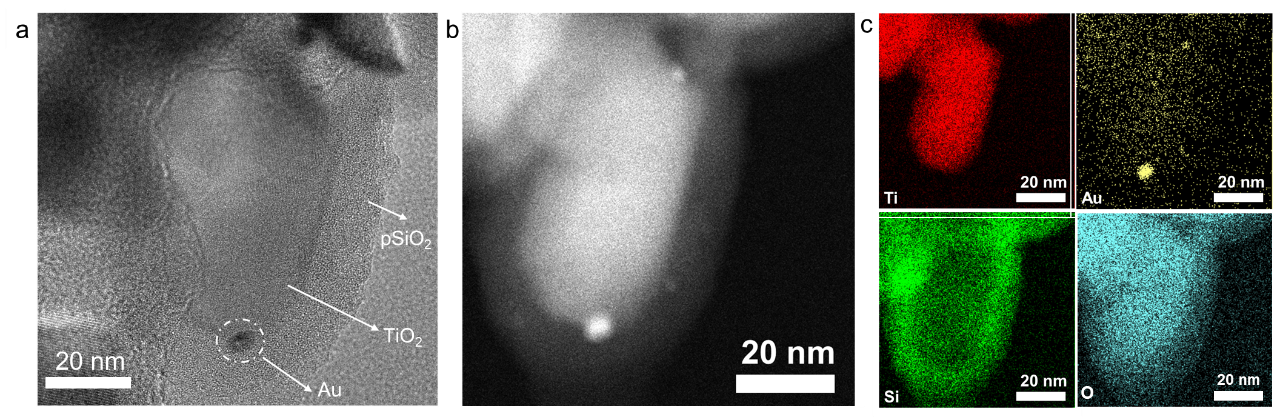


**Supplementary Fig. 3. TEM characterization of Au/TiO2@pSiO2-1.7 nm.** **a,** HR-TEM image of Au/TiO2@pSiO2-1.7. **b,** HAADF-STEM image. **c,** EDS elemental maps.


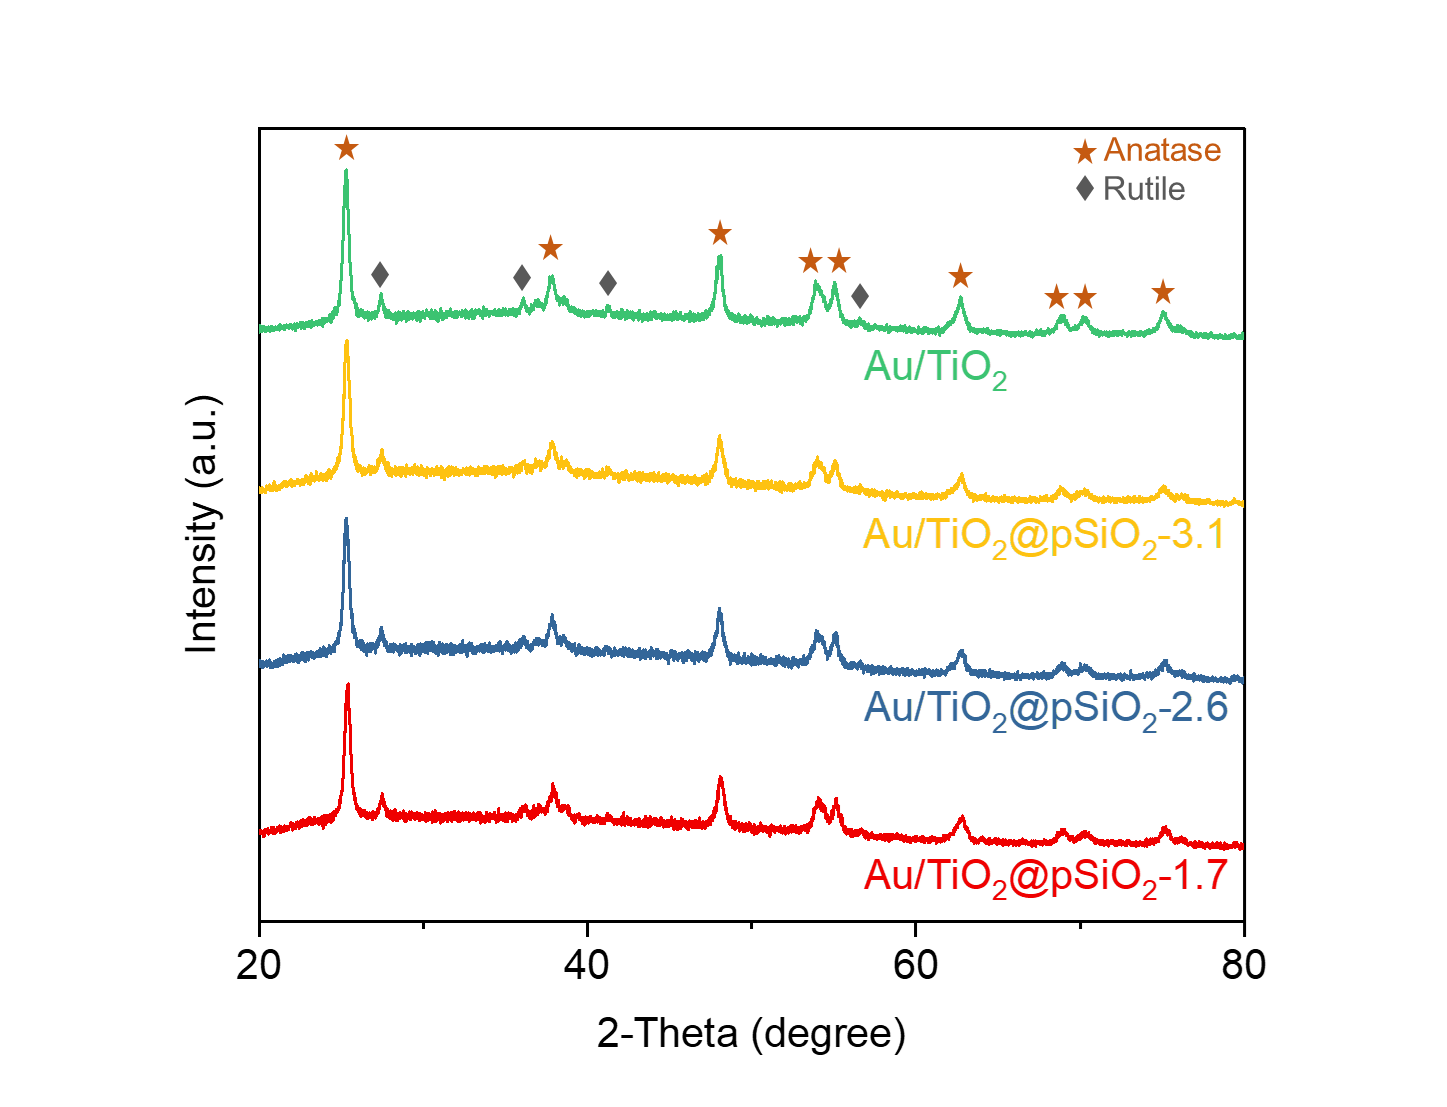


**Supplementary Fig. 4**. **XRD patterns of Au/TiO2 and Au/TiO2@pSiO2-X.**


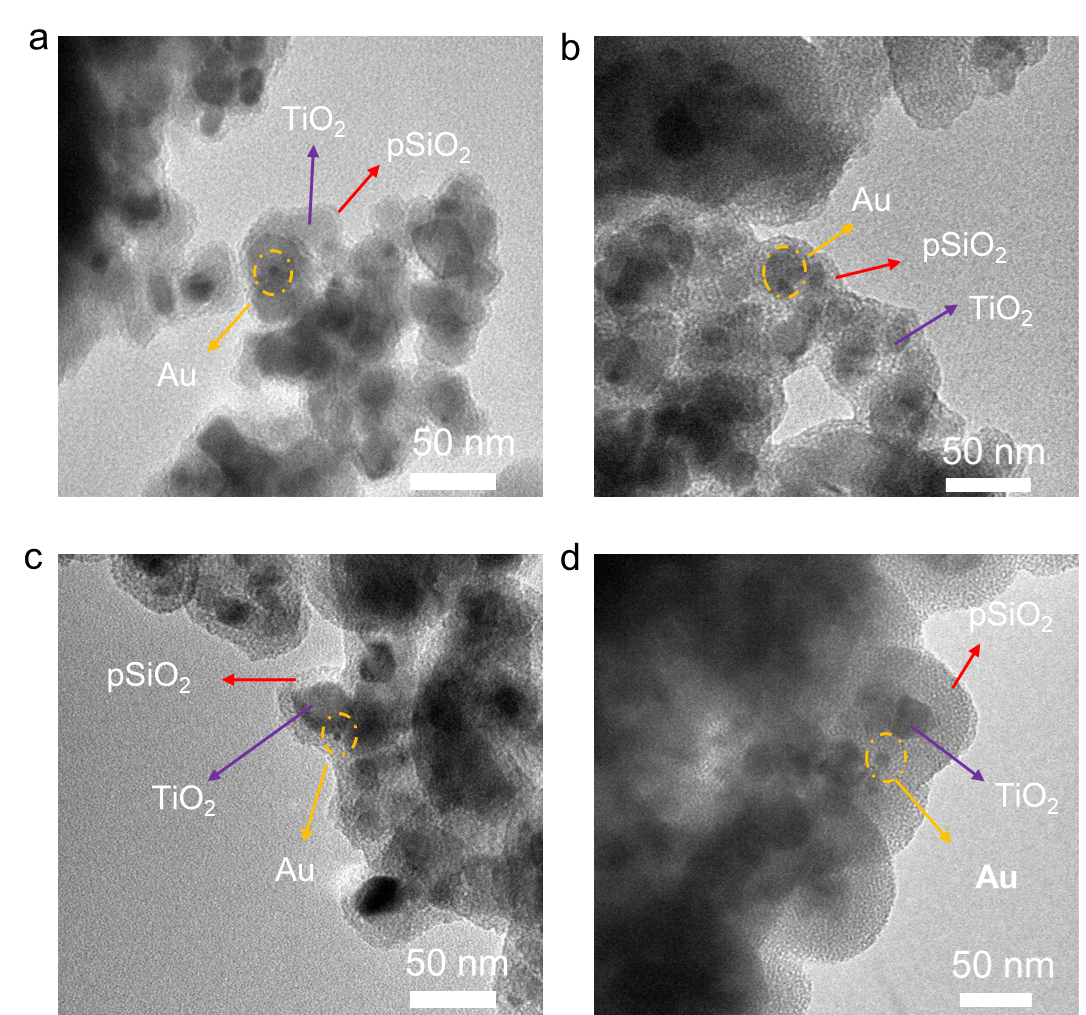


**Supplementary Fig. 5. TEM images of Au/TiO2@pSiO2-2.6 with different SiO2 thickness**: **a**, 3.6 nm. **b**, 6 nm. **c**, 8 nm. **d**, 30 nm.


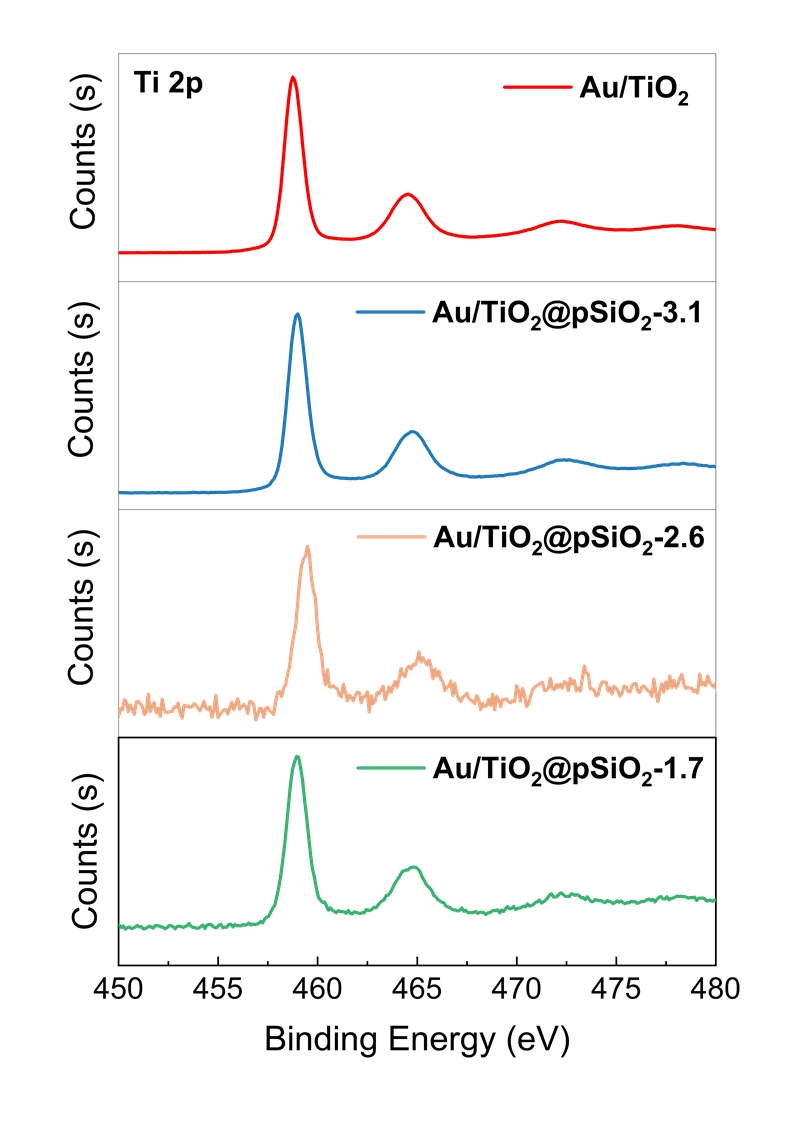


**Supplementary Fig. 6. Ti 2p XPS spectrum of Au/TiO2 and Au/TiO2@pSiO2-X catalysts**.


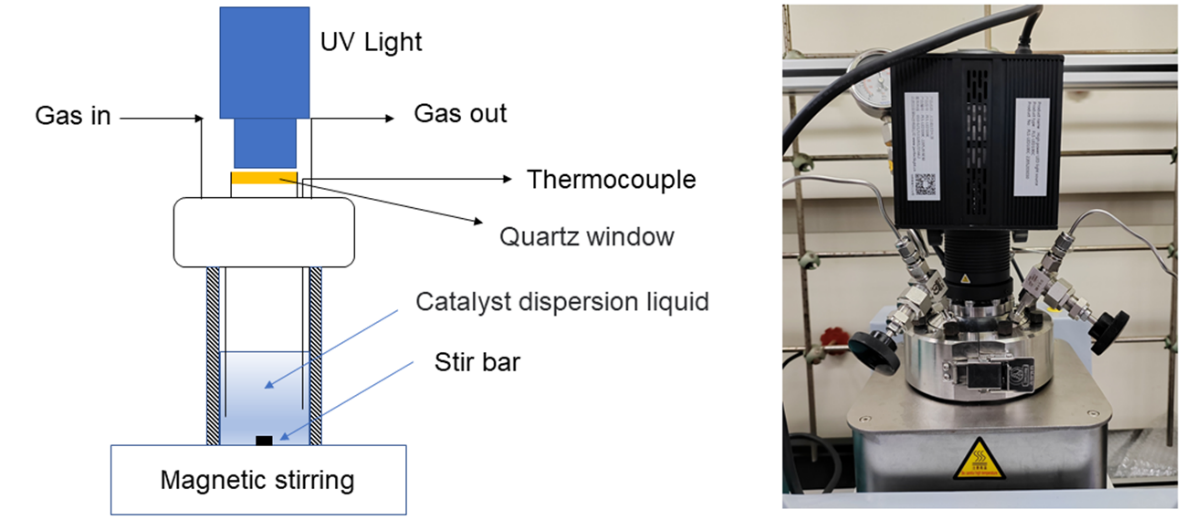


**Supplementary Fig. 7. Schematic and image of the photocatalytic batch reactor setup.**


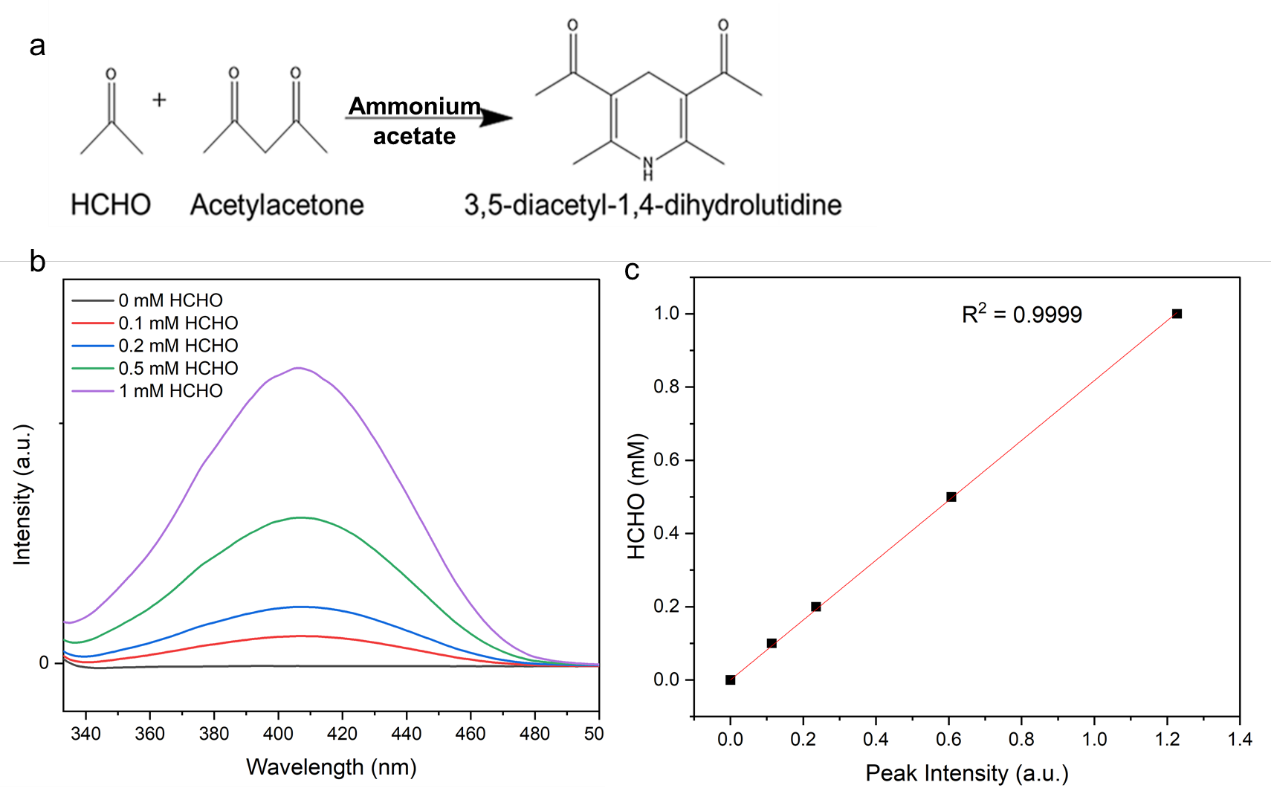


**Supplementary Fig. 8.** **Quantification method for formaldehyde (HCHO).** **a,** Reaction mechanism on acetylacetone color-developing method to detect HCHO. **b,** UV-Vis absorption spectra of yellow-colored 3,5-diacetyl-1,4-dihydrolutidine formed from varying concentrations of HCHO standard solutions. **c,** Calibration curve for the quantification of HCHO by colorimetric method.

**Note**: The quantitative determination of formaldehyde (HCHO) in aqueous solutions using the acetylacetone method is based on the Hantzsch reaction2. In the presence of excess ammonium salt, HCHO reacts with acetylacetone and ammonia to form yellow-colored 3,5-diacetyl-1,4-dihydrolutidine. This compound has a characteristic UV-Vis absorption peak at 412 nm, and the intensity of this peak is directly proportional to the HCHO concentration.


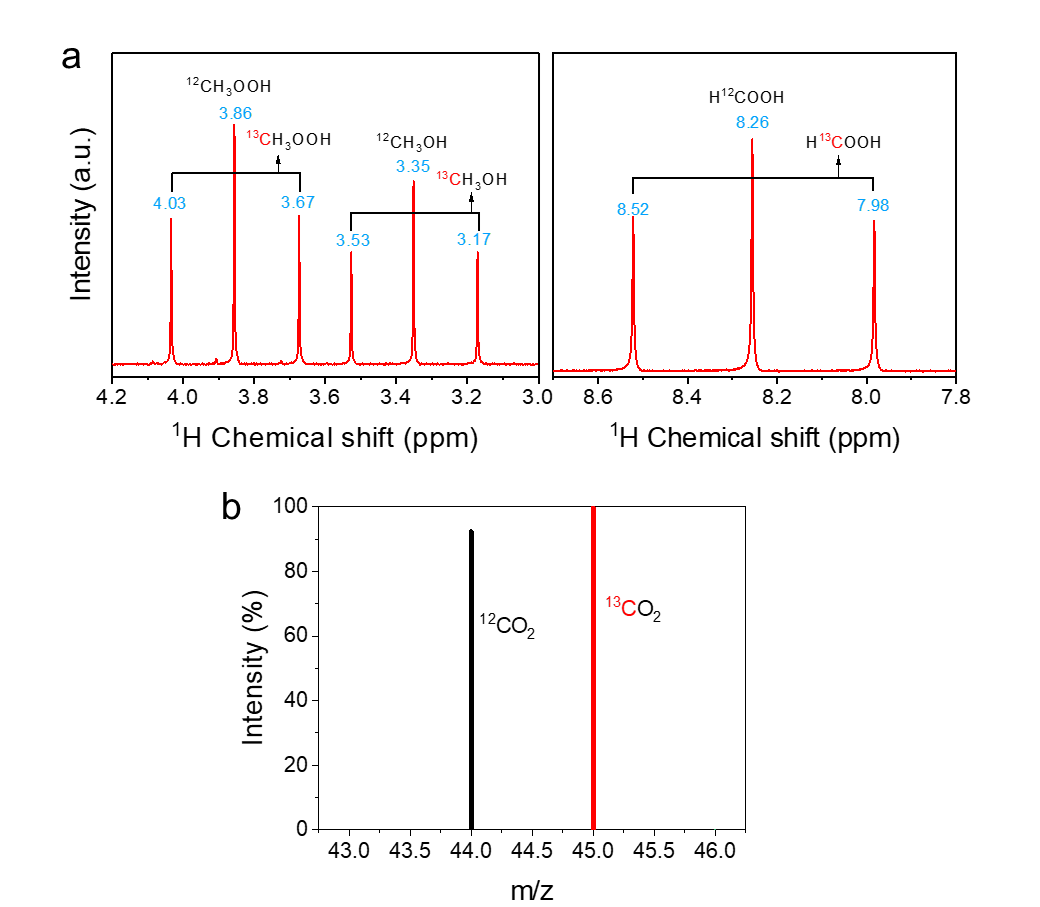


**Supplementary Fig. 9. 13CH4 isotope labeling experiments on Au/TiO2@pSiO2-1.7.** **a,** 1H NMR spectrum of methane oxidation reaction Au/TiO2@pSiO2-1.7 carried out with 13CH4 and 12CH4 mixture (55% 13CH4 and 45% 12CH4). DMSO is used as internal standard. 13CH3OH (δ = 3.53 and δ = 3.17), 13CH3OOH (δ = 4.03 and δ = 3.67), and H13COOH (δ = 8.52 and δ = 7.98) satellite peaks are observed along with main 12C peaks (δ = 3.35, δ = 3.86 and δ= 8.26, respectively); The integrated area of the satellite 13C peaks vs the integrated area of the 12C peak corresponding to the 0.55:0.45 ratio of 13CH4 and 12CH4 feeding gas. **b,** GC-MS spectra of CO2 formed during photocatalytic methane oxidation with 13CH4 and 12CH4 mixture (55% 13CH4 and 45% 12CH4). 13CO2 and 12CO2 peaks with ratios of 0.55:0.45 were observed.


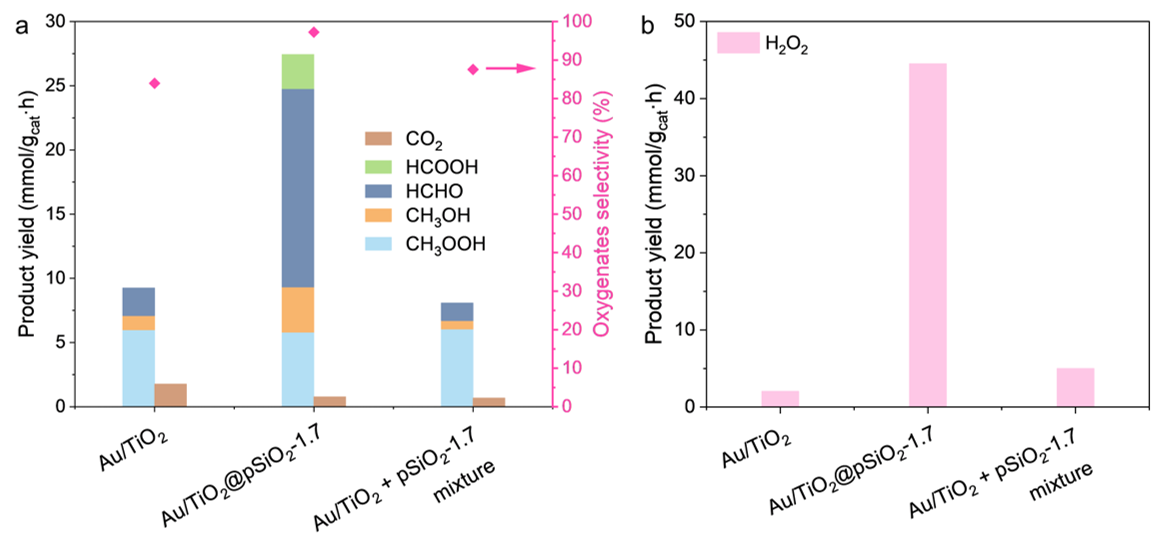


**Supplementary Fig. 10. Comparison of catalytic activity of Au/TiO2@pSiO2-1.7 and the physical mixture of Au/TiO2 and porous silica (pSiO2-1.7).** Reaction conditions: 10 mg Catalysts, 100 mL H2O, 2.5 MPa CH4, 1 MPa O2, 1 h reaction time, reaction temperature of 25 °C, light source: 365 nm UV LED, 80 mW/cm2.


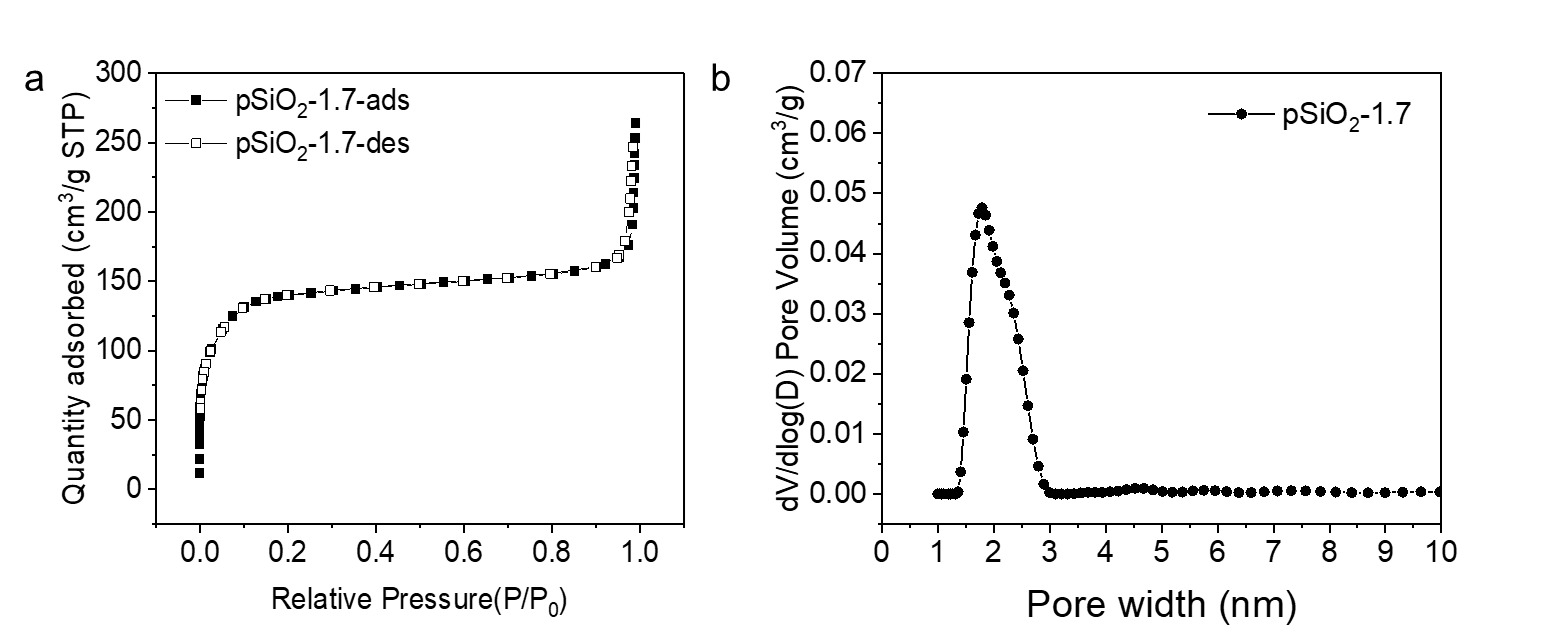


**Supplementary Fig. 11. Porosity characterization of as-synthesized porous SiO2 with 1.7 nm pore (i.e., pSiO2-1.7). a**, Nitrogen adsorption-desorption isotherms. **b**, Pore size distribution calculated from the N2 adsorption isotherms.


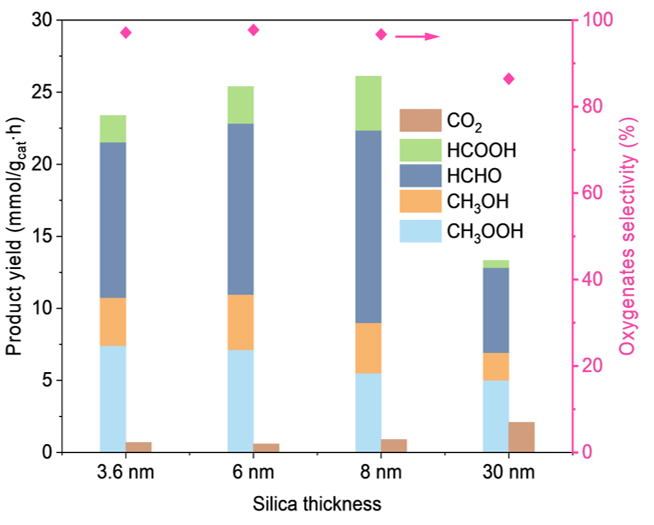


**Supplementary Fig. 12**. **Photocatalytic performance of CH4 oxidation over Au/TiO2@pSiO2-1.7 with different silica thickness.** Reaction condition: 10 mg photocatalyst, 100 mL H2O, 2.5 MPa CH4, 1 MPa O2, 1h reaction time, 25±3 ᵒC reaction temperature, light source: 365 nm UV LED, 80 mW/cm2.


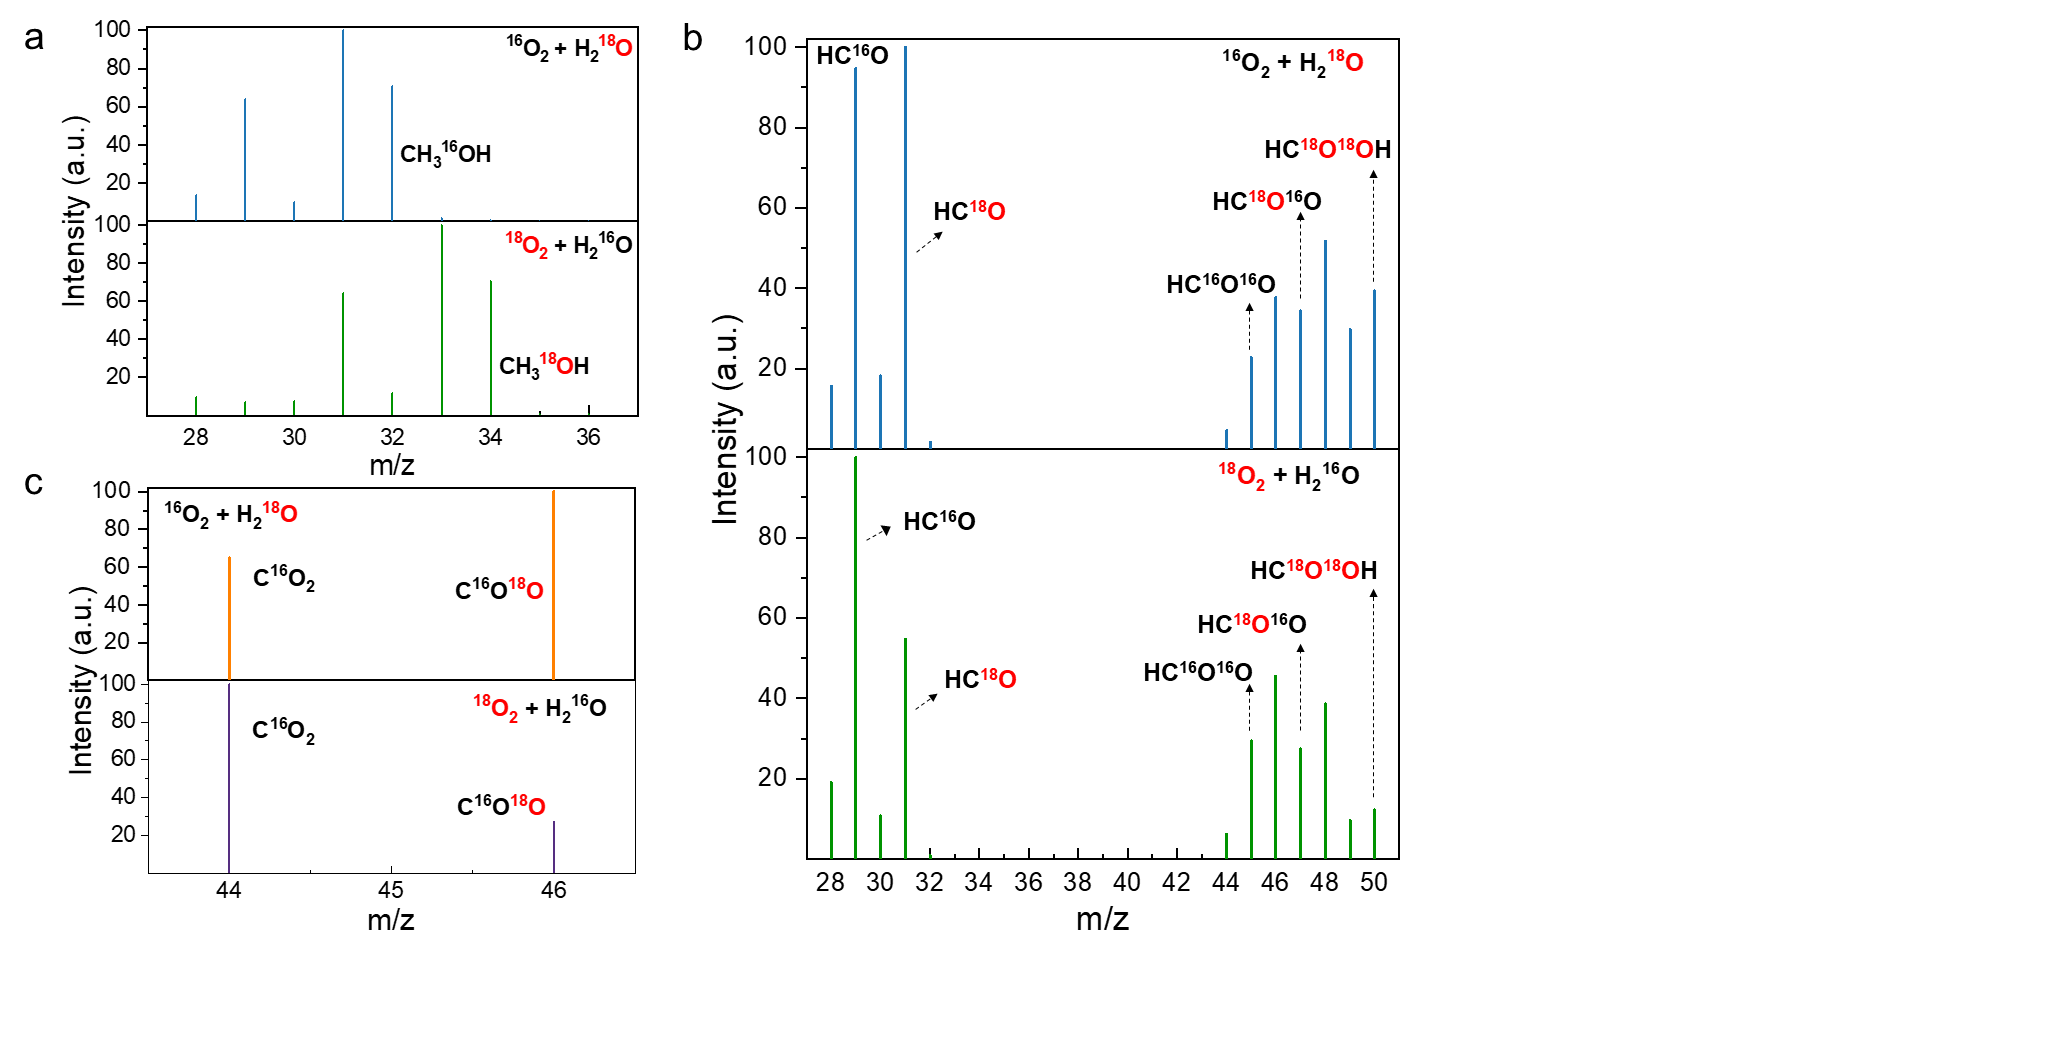


**Supplementary Fig. 13. 18O isotopic labeling experiment over Au/TiO2@pSiO2-1.7 in photocatalytic CH4 oxidation.** **a,** GC-MS spectra of CH3OH. **b**, GC-MS spectra of HCOOH. **c**, GC-MS spectra of CO2.

**Note**: For CH3OH, m/z= 33 and 34 were only observed when 18O2 and H216O were used, indicating 100% of the 18O in 18O2 was incorporated into CH3OH. No CH318OH was detected in reactions with 16O2 and H218O. These results suggest that the O in CH3OH originate solely from O2. Although the amount of HCHO produced is too low to analyze its isotopic composition using GC-MS, it can readily be formed through the photocatalytic dehydrogenation of CH3OH4. Thus, the O atoms of HCHO should also be derived from O2 in photocatalytic CH4 oxidation.

For both HCOOH and CO2, fragment ion peaks labeled with 18O and 16O were observed in the experiments with 18O2 + H216O and 16O2 + H218O. This indicates that the oxygen atoms in HCOOH and CO2 originate from both H2O and O2.


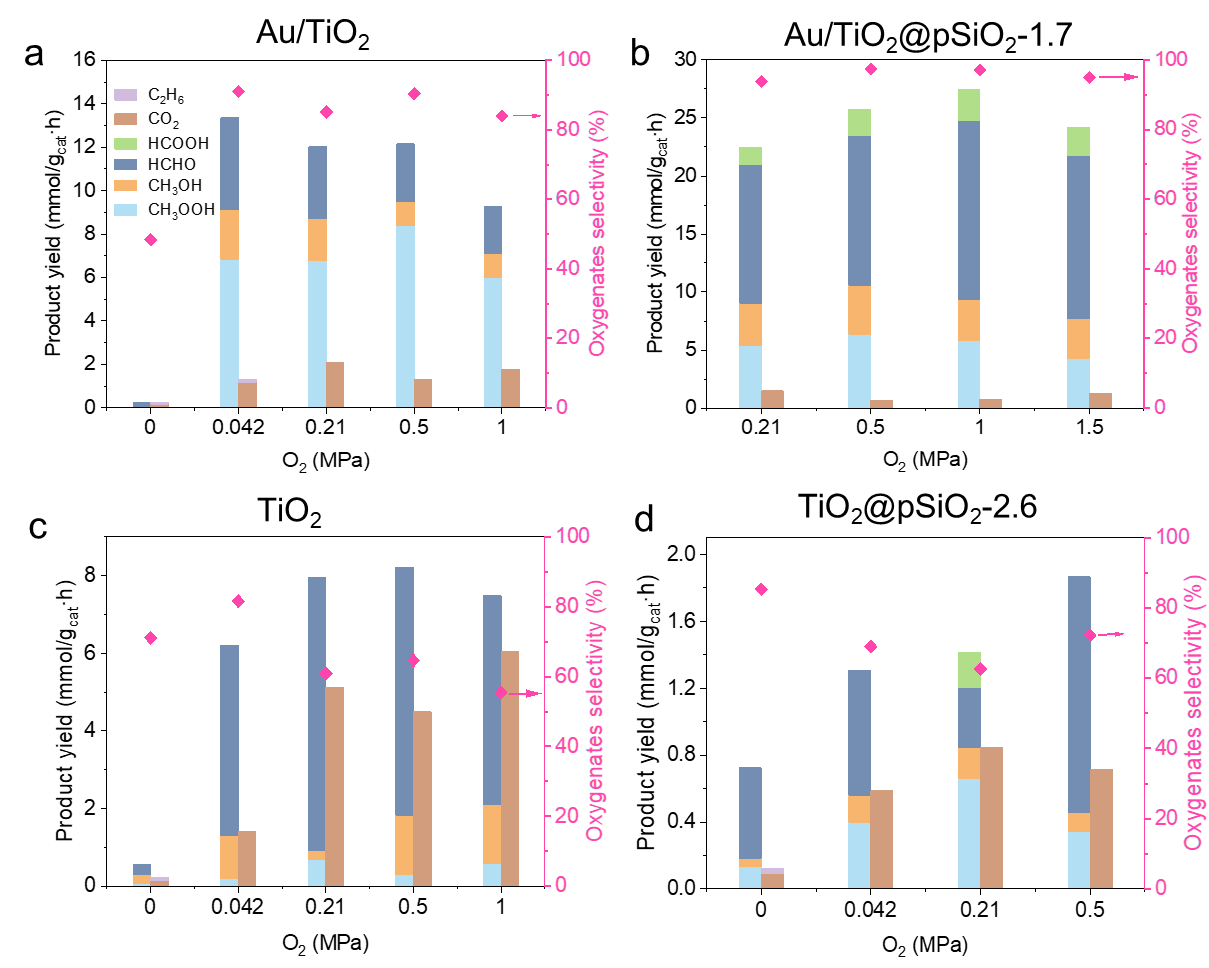


**Supplementary Fig. 14.** **Photocatalytic performance of CH4 oxidation under different O2 partial pressure.** **a**, Photocatalytic activity of Au/TiO2.**b**, Photocatalytic activity of Au/TiO2@pSiO2-1.7. **c**, Photocatalytic activity of TiO2. **d**, Photocatalytic activity of TiO2@pSiO2-2.6. Reaction conditions: 10 mg Catalysts, 100 mL H2O, 2.5 MPa CH4, 1 h reaction time, reaction temperature of 25 °C, light source: 365 nm UV LED, 80 mW/cm2.


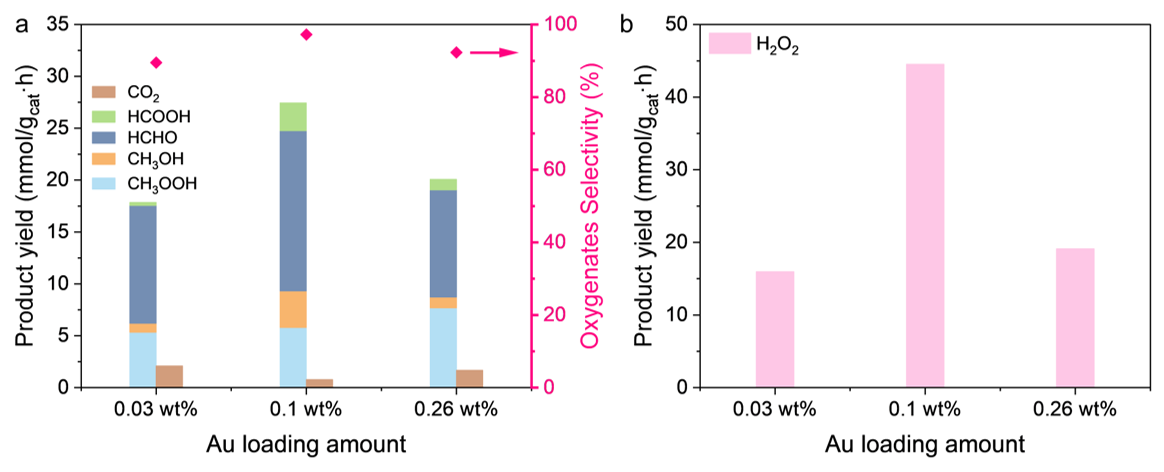


**Supplementary Fig. 15**. **Photocatalytic performance of CH4 oxidation over Au/TiO2@pSiO2-1.7 with varying Au loading amount. a**, Photocatalytic activity of CH4 oxidation to oxygenates. **b**, H2O2 production. Reaction condition: 10 mg photocatalyst, 100 mL H2O, 2.5 MPa CH4, 1 MPa O2, 1h reaction time, 25±3 ᵒC reaction temperature, light source: 365nm UV LED, 80 mW/cm2.

**Note**: 0.1 wt. % Au loaded photocatalyst produced the optimum oxygenates yields. Further increasing Au loading led to lower oxygenates and H2O2 production and can be attributed to the shielding effect: Au blocks light from reaching the TiO2 surface


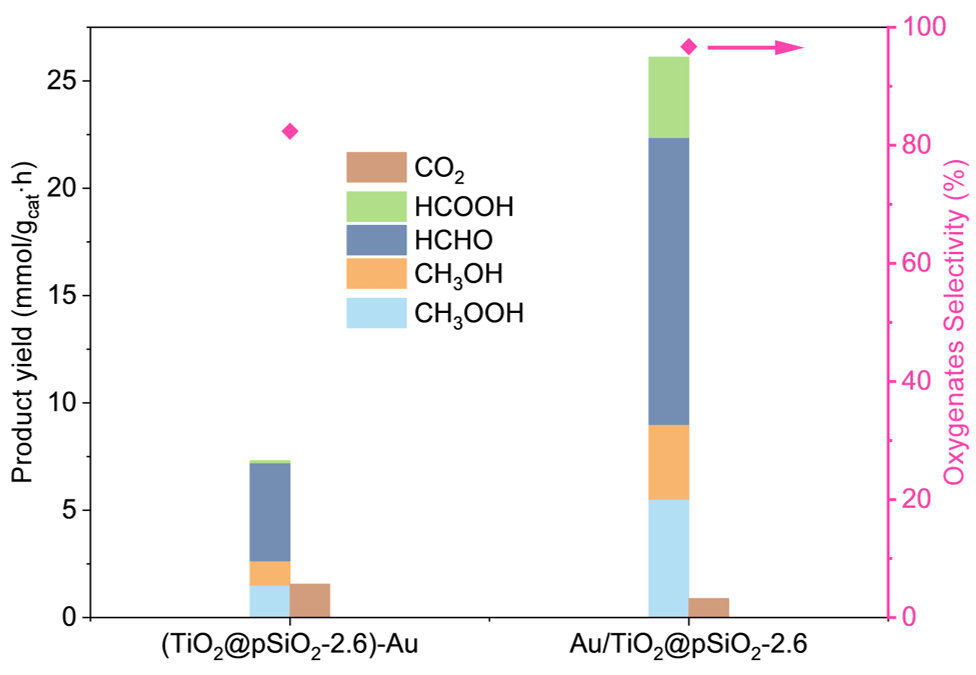


**Supplementary Fig. 16.** **Effect of Au cocatalyst position on the photocatalytic methane oxidation performance of TiO2@pSiO2 catalysts.** One the left: Au loaded on the outer layer of SiO2 shell; On the right: Au loaded onto TiO2, which is enclosed within the SiO2 shell. Reaction conditions: 10 mg Catalysts, 100 mL H2O, 2.5 MPa CH4, 1 MPa O2, 1 h reaction time, reaction temperature of 25 °C, light source: 365 nm UV LED, 80 mW/cm2.


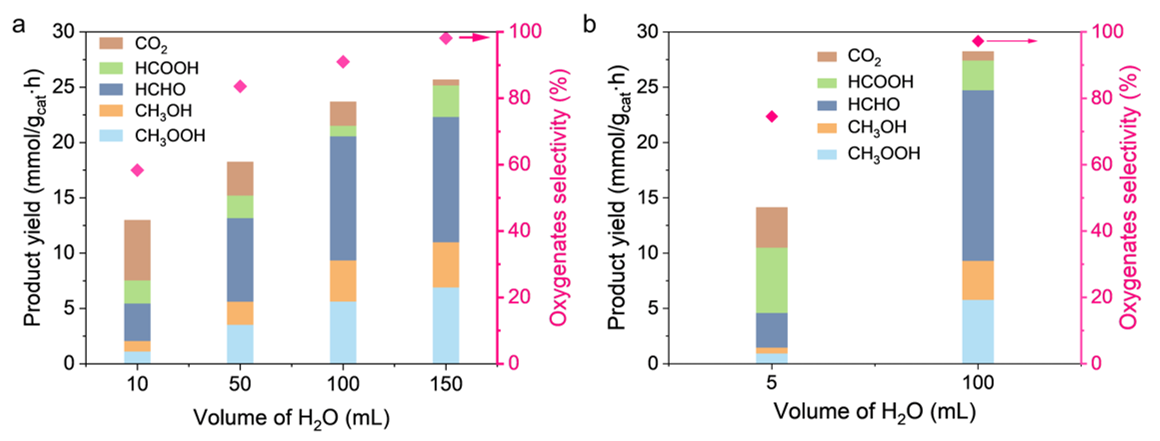


**Supplementary Fig. 17. Effect of water amount on the catalytic performance. a**, Photocatalytic activity of Au/TiO2@pSiO2-2.6. Reaction conditions: 10 mg Catalyst, 2.5 MPa CH4, 0.5 MPa O2, 365nm UV (80 mW/cm2). **b**, Photocatalytic activity of Au/TiO2@pSiO2-1.7. Reaction conditions: 10 mg Catalyst, 2.5 MPa CH4, 1 MPa O2, 365nm UV (80 mW/cm2).





**Supplementary Fig. 18.** **Cycling measurements of photocatalytic CH4 oxidation over Au/TiO2@pSiO2-1.7**. Reaction conditions: 10 mg catalysts, 100 mL H2O, 2.5 MPa CH4, 0.5 MPa O2, 1 h reaction time, reaction temperature of 25 °C, light source of 365 nm UV LED, 75 mW/cm2.

**
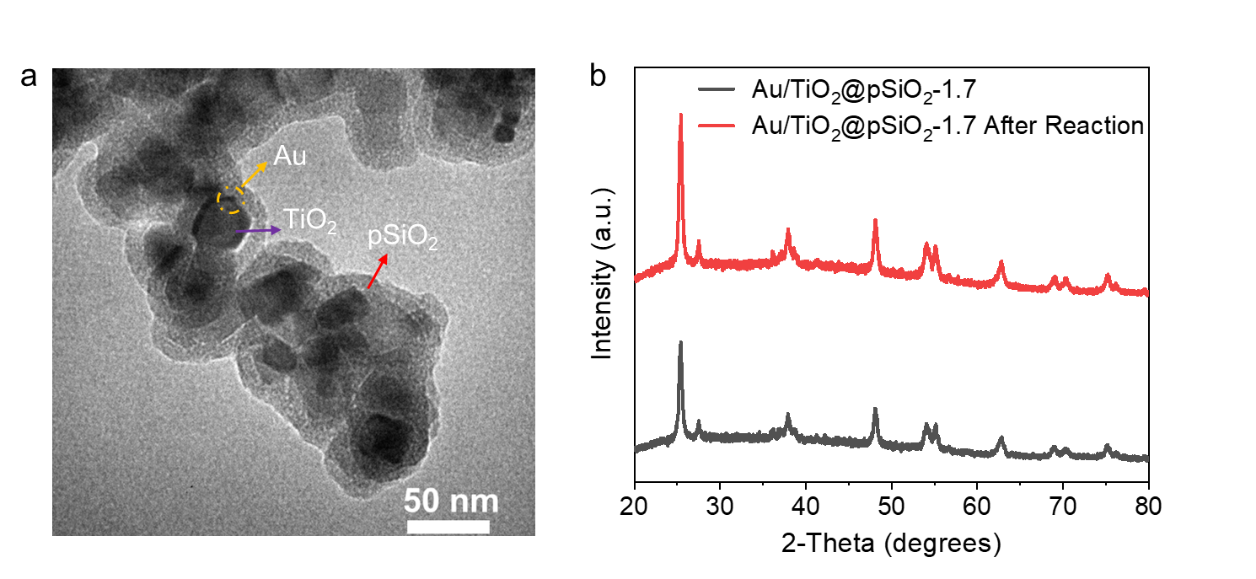
**

**Supplementary Fig. 19. Structure characterization of Au/TiO2@pSiO2-1.7 after four cycles of reactions. a,** TEM image of Au/TiO2@pSiO2-1.7 after reaction**. b,** XRD pattern of Au/TiO2@pSiO2-1.7 after reaction. No obvious structure changes were observed.

**
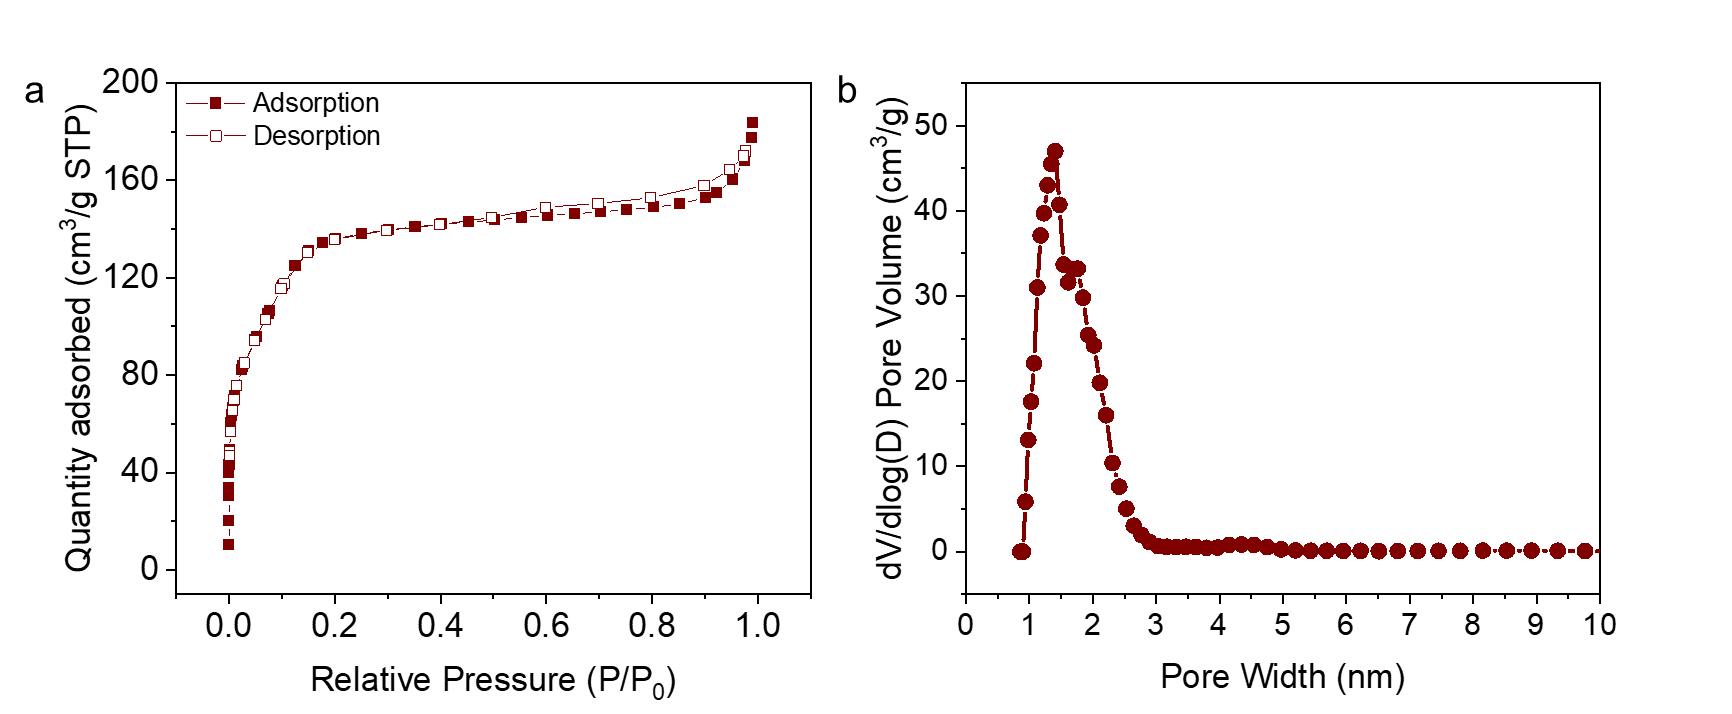
**

**Supplementary Fig. 20. Porosity characterization of Au/TiO2@pSiO2-1.7 after four cycles of reactions. a,** Nitrogen adsorption-desorption isotherms**. b,** Pore size distribution calculated from the N2 adsorption isotherms**.** The pore size distribution and surface area of the recycled catalysts were similar to those of the fresh catalysts.

**
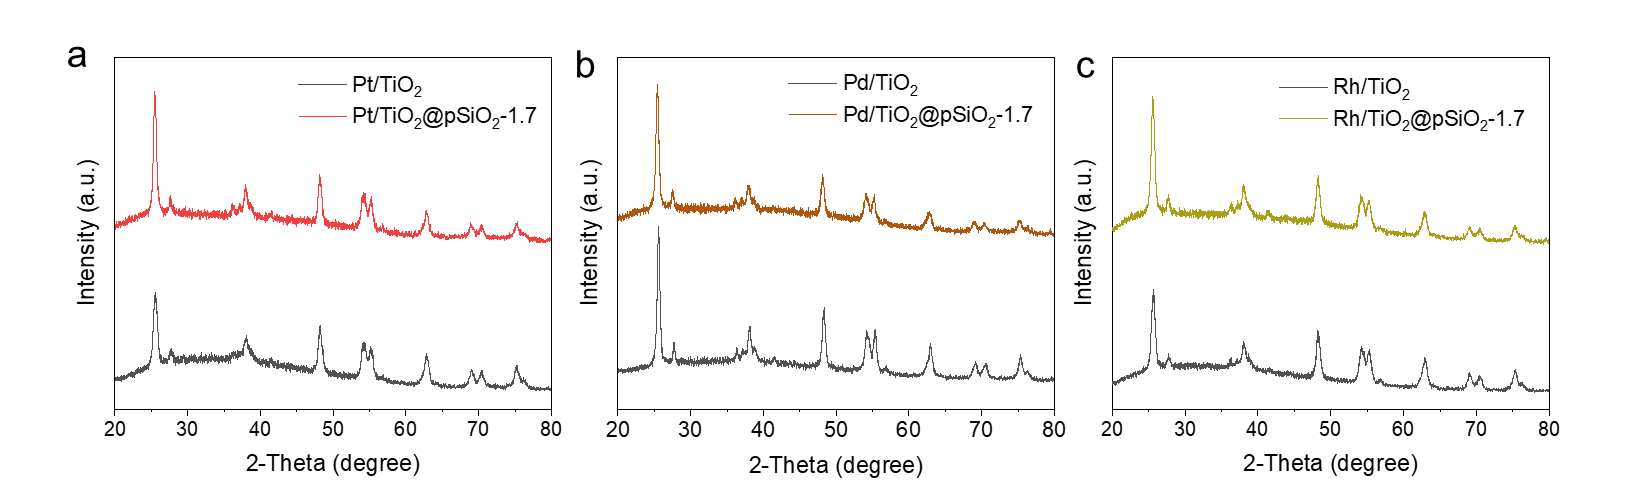
**

**Supplementary Fig. 21. XRD patterns of M/TiO2 and M/TiO2@pSiO2-1.7.** M refers to Pt (a), Pd (b), and Rh (c), respectively.


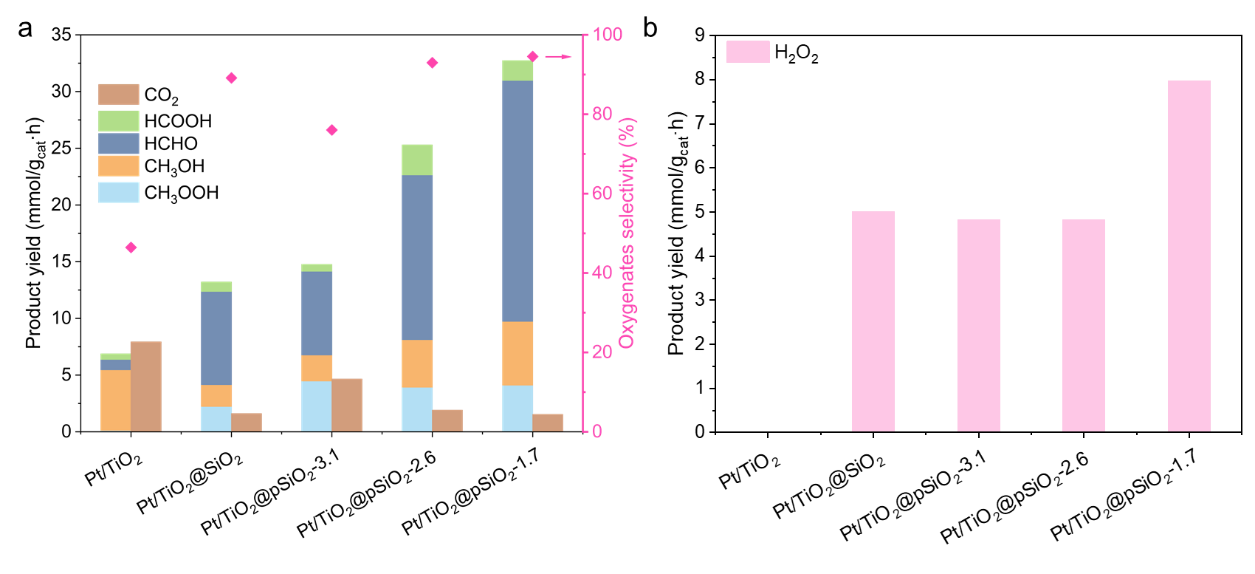


**Supplementary Fig. 22**. **Photocatalytic activity of CH4 oxidation with O2 over Pt/TiO2@pSiO2-X with different silica pore size**. **a,** Oxygenates yields from CH4 oxidation over different photocatalysts. **b**, H2O2 production from CH4 oxidation over different photocatalysts. Reaction condition: 10 mg photocatalyst, 100 mL H2O, 2.5 MPa CH4, 1 MPa O2, 1 h reaction time, 25±3 ᵒC reaction temperature, light source: 365 nm UV LED, 80 mW/cm2 .


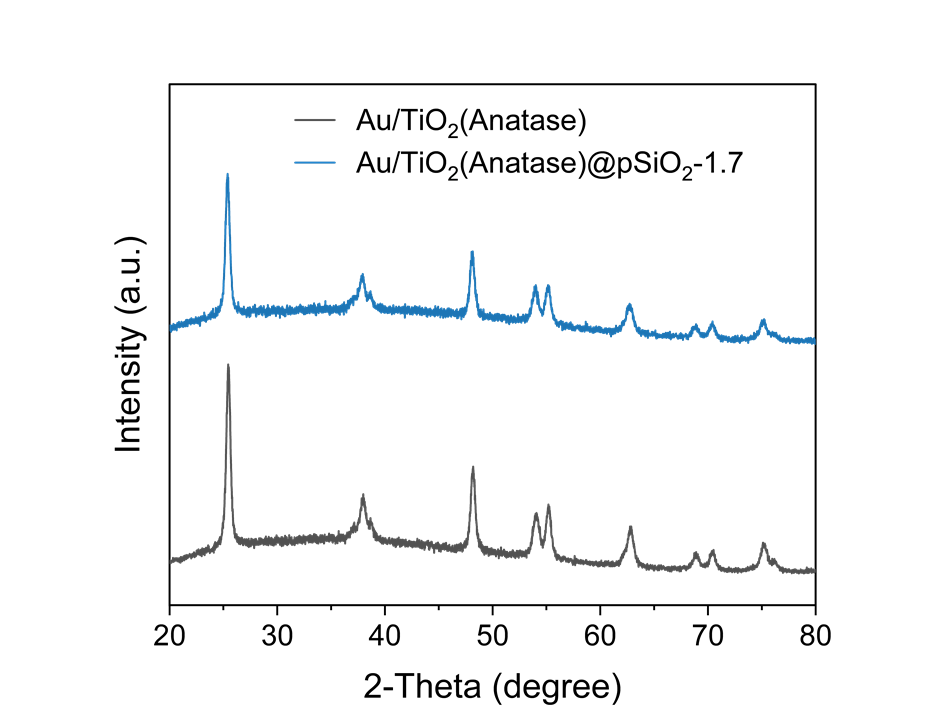


**Supplementary Fig. 23**. **XRD patterns of as-synthesized Au/A-TiO2 and Au/A-TiO2@pSiO2-1.7**.

**
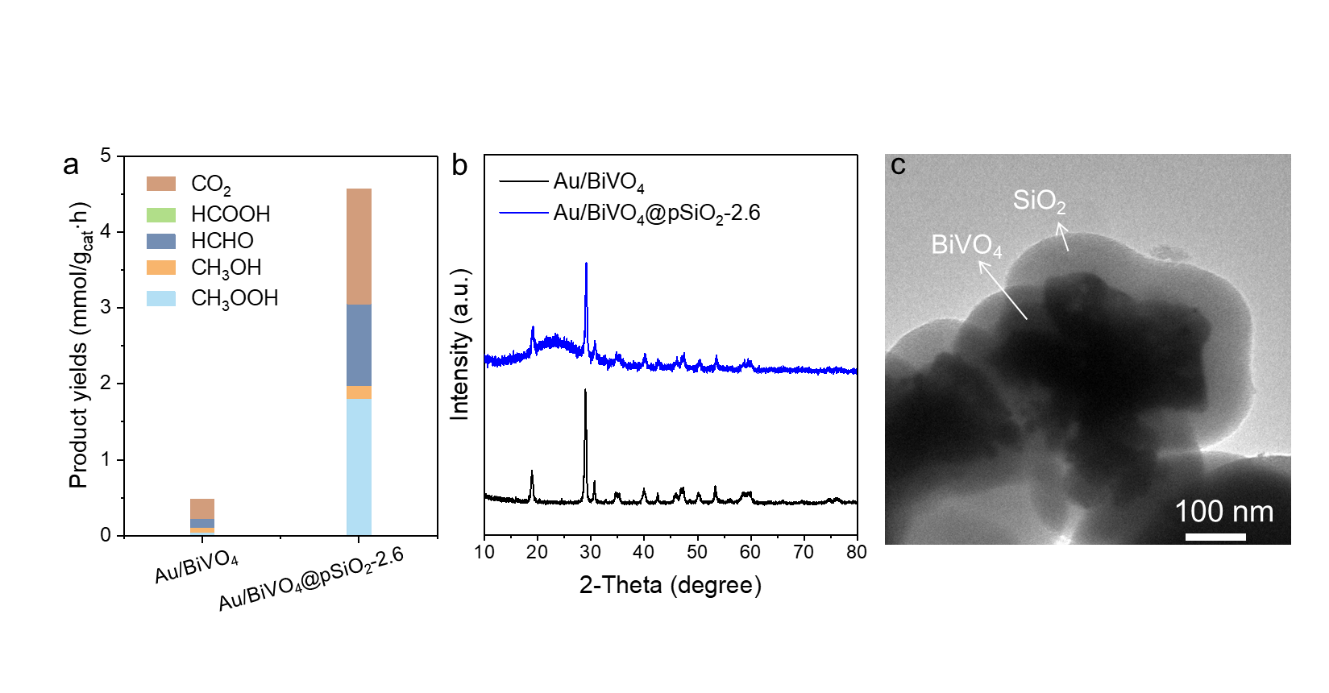
**

**Supplementary Fig. 24**. **Photocatalytic activity of CH4 oxidation with O2 over Au/BiVO4 and Au/BiVO4@pSiO2-2.6**. **a**, Oxygenates yields from CH4 oxidation over different photocatalysts. Reaction condition: 10 mg photocatalyst, 100 mL H2O, 2.5 MPa CH4, 1 MPa O2, 1h reaction time, 25±3 ᵒC reaction temperature, light source: 365 nm UV LED, 80 mW/cm2 .**b**, XRD patterns of Au/BiVO4 and Au/BiVO4@pSiO2-2.6. **c**, TEM images of as-synthesized Au/BiVO4@pSiO2-2.6.


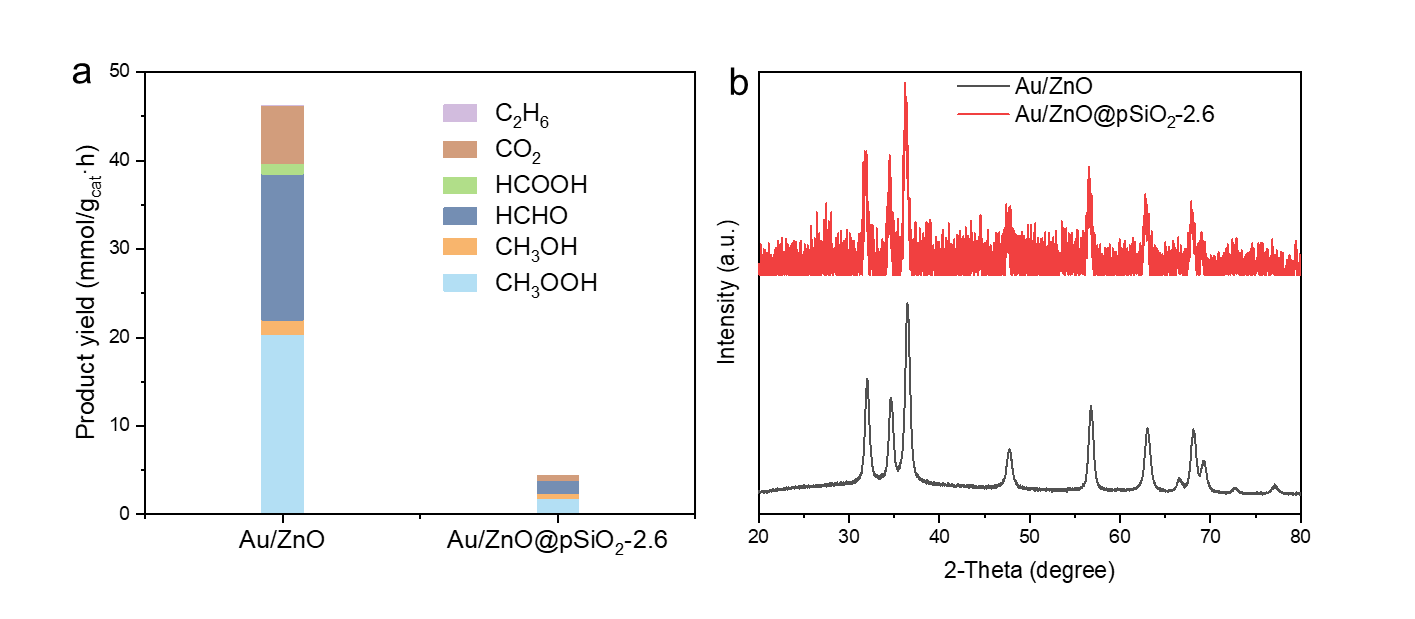


**Supplementary Fig. 25**. **Photocatalytic activity of CH4 oxidation with O2 over Au/ZnO and Au/ZnO@pSiO2-2.6. a**, Oxygenates yields from CH4 oxidation over different photocatalysts. Reaction condition: 10 mg photocatalyst, 100 mL H2O, 2.5 MPa CH4, 1 MPa O2, 1h reaction time, 25±3 ᵒC reaction temperature, light source: 365 nm UV LED, 80 mW/cm2 .**b**, XRD patterns of Au/ZnO and Au/ZnO@pSiO2-2.6 .

**Note**: Encapsulating ZnO with porous SiO2 significantly decreased its CH4 conversion rates. This is likely due to ZnO dissolution in the ammonia solution used during SiO2 coating, as supported by the broader and more noisy peaks for Au/ZnO@pSiO2-2.6 in XRD pattens.


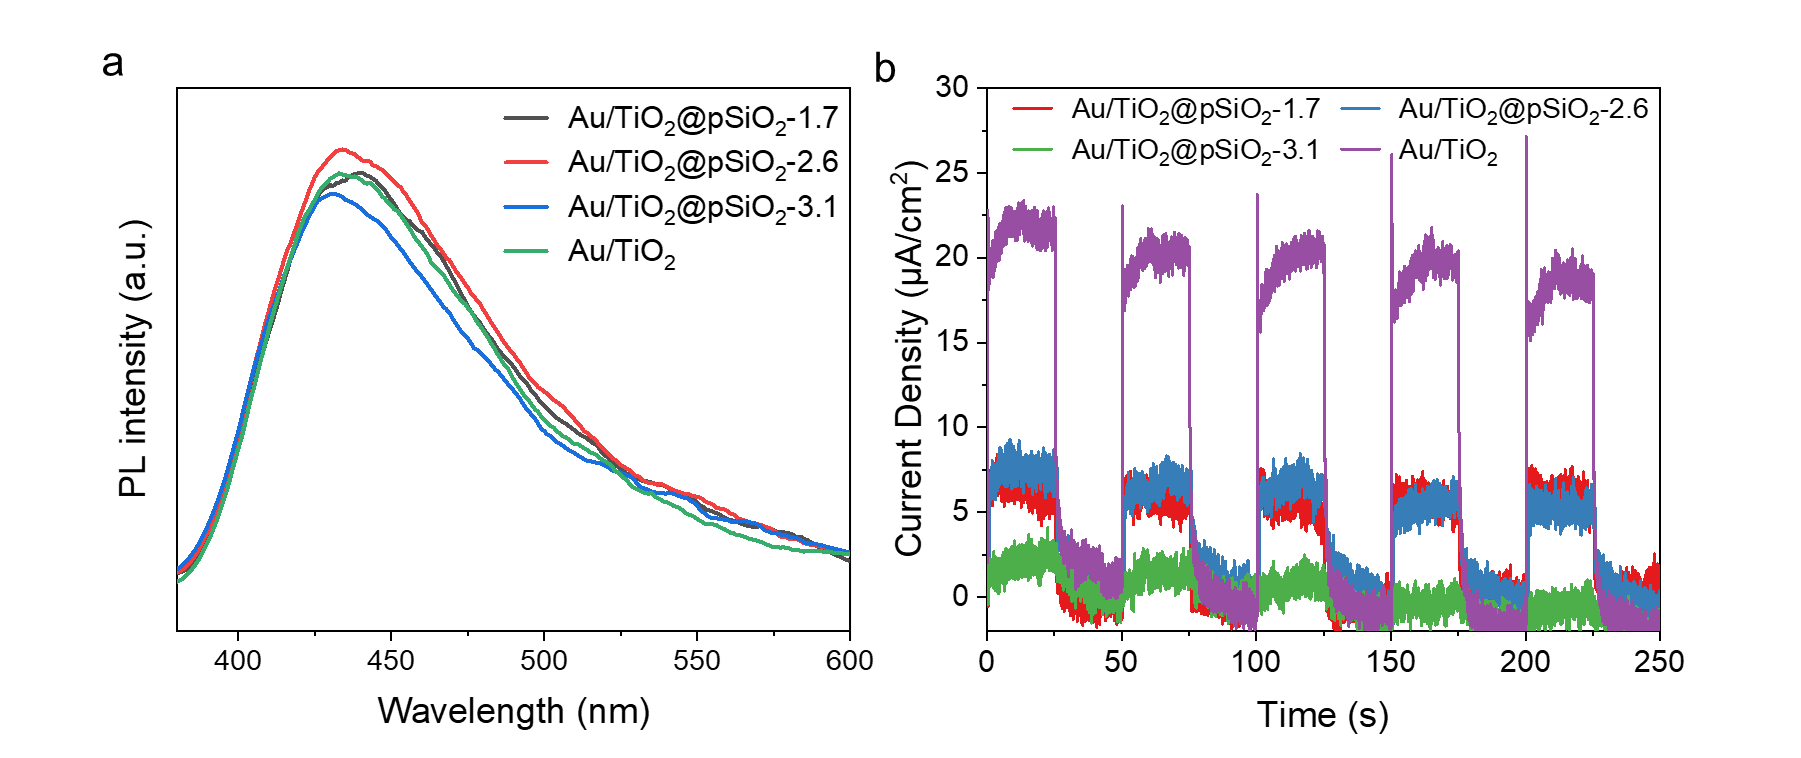


**Supplementary Fig. 26. Photoelectrochemical and photoluminescence characterization.** **a,** Steady-state PL spectra of Au/TiO2 and Au/TiO2@pSiO2-X**. b,** Photocurrent measurement Au/TiO2 and Au/TiO2@pSiO2-X as catalysts under light irradiation.


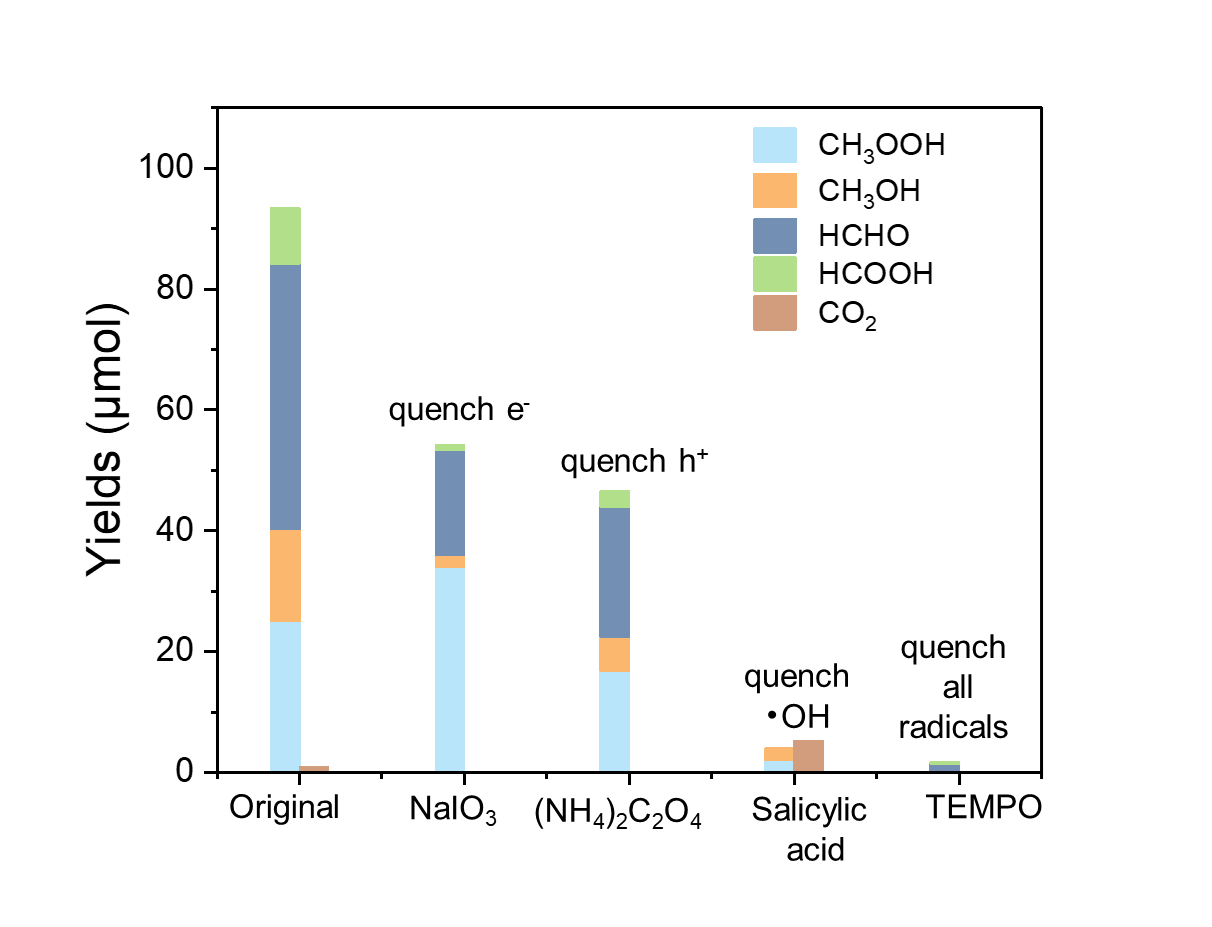


**Supplementary Fig. 27. Photocatalytic CH4 oxidation over Au/TiO2@pSiO2-1.7 with the addition of scavengers**. Reaction conditions: 10 mg catalyts, 100 mL H2O, 2.5 MPa CH4, 0.5 MPa O2, UV irridiation for 10 min, 149.04 mW/cm2.


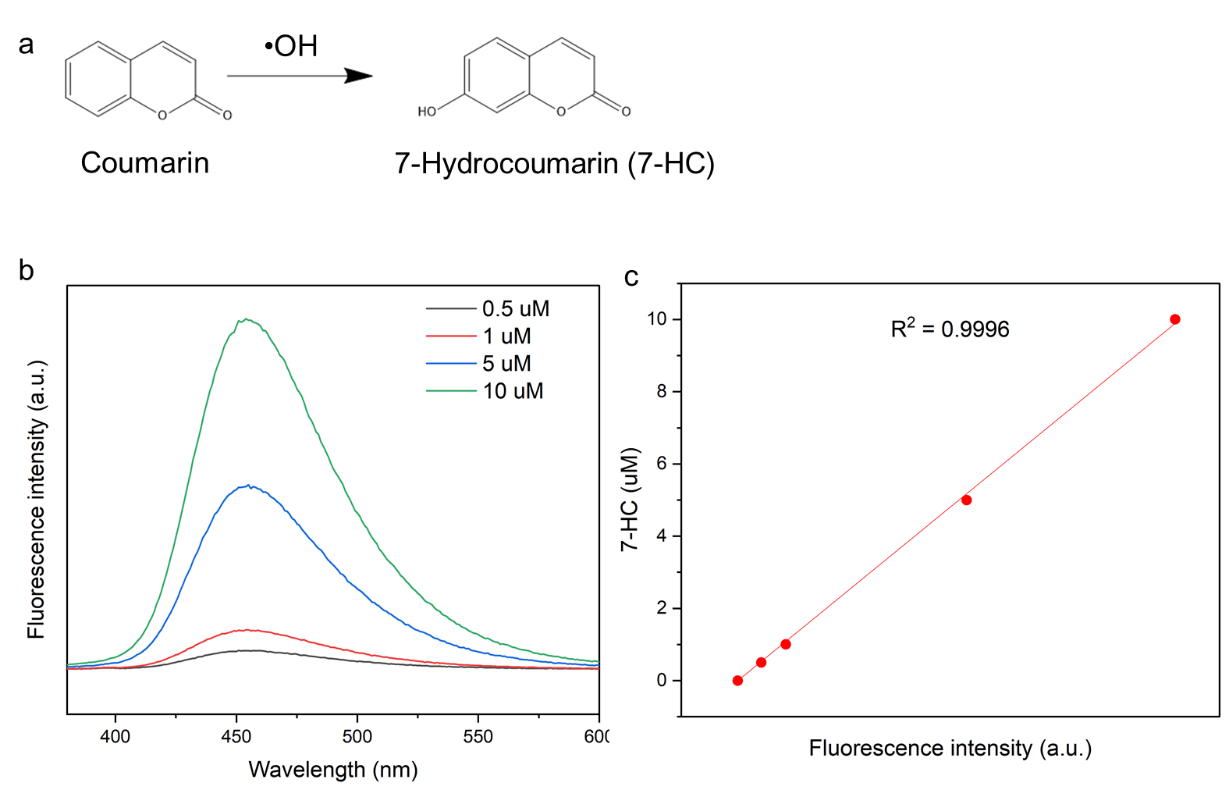


**Supplementary Fig. 28.** **Hydroxyl radical detection with coumarin probe**. **a,** Schematic of hydroxyl radical detection using coumarin, leading to the formation of 7-hydroxycoumarin (7-HC) as a fluorescent product. **b,** Fluorescence spectra of 7-hydroxycoumarin formed from coumarin at varying concentrations. **c,** Standard curves for the quantification of 7-HC via fluorescence spectra.


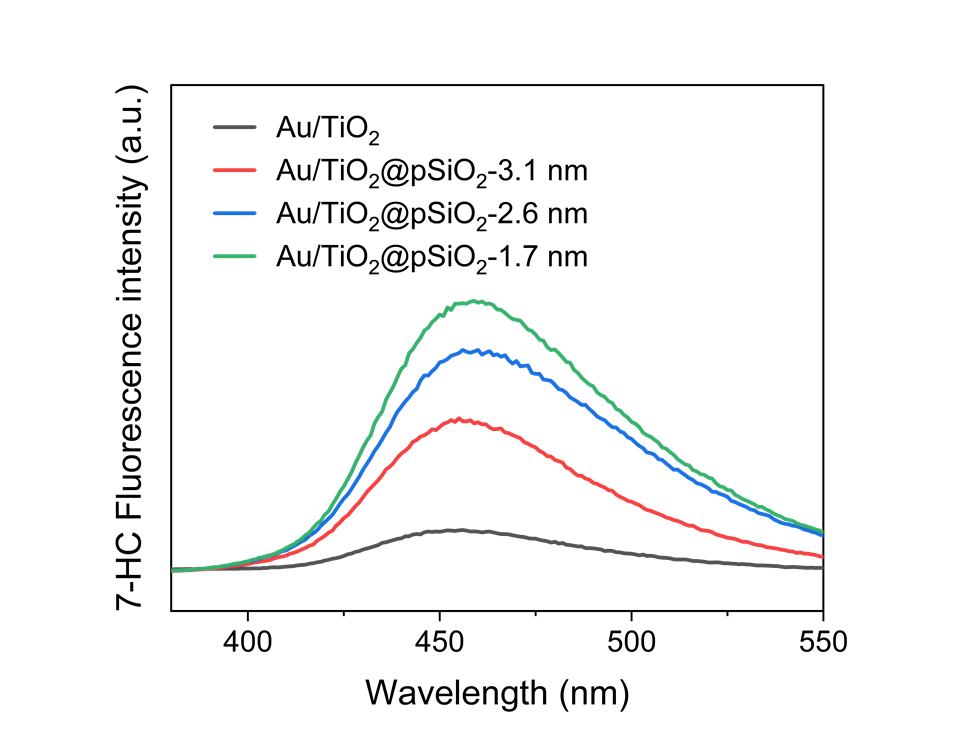


**Supplementary Fig. 29. Fluorescence spectra of the produced 7-HC for •OH radical detection over different photocatalysts under UV irradiation.**

**
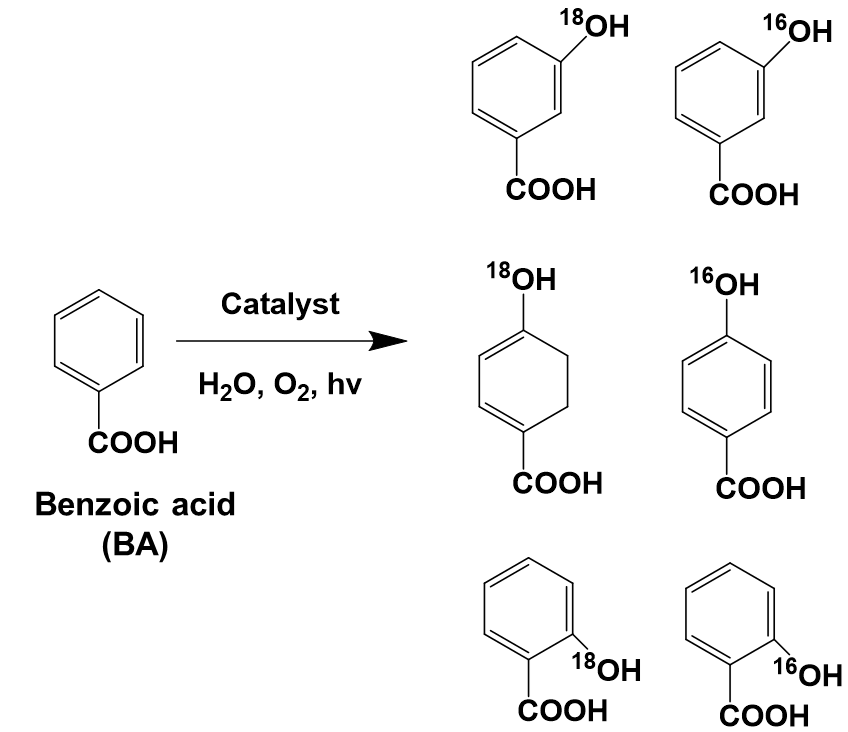
**

**Supplementary Fig. 30. Illustration of in situ •OH capture using benzoic acid as a probe.** Hydroxybenzoic acid is formed as the product, which was analyzed by LC-MS.

**
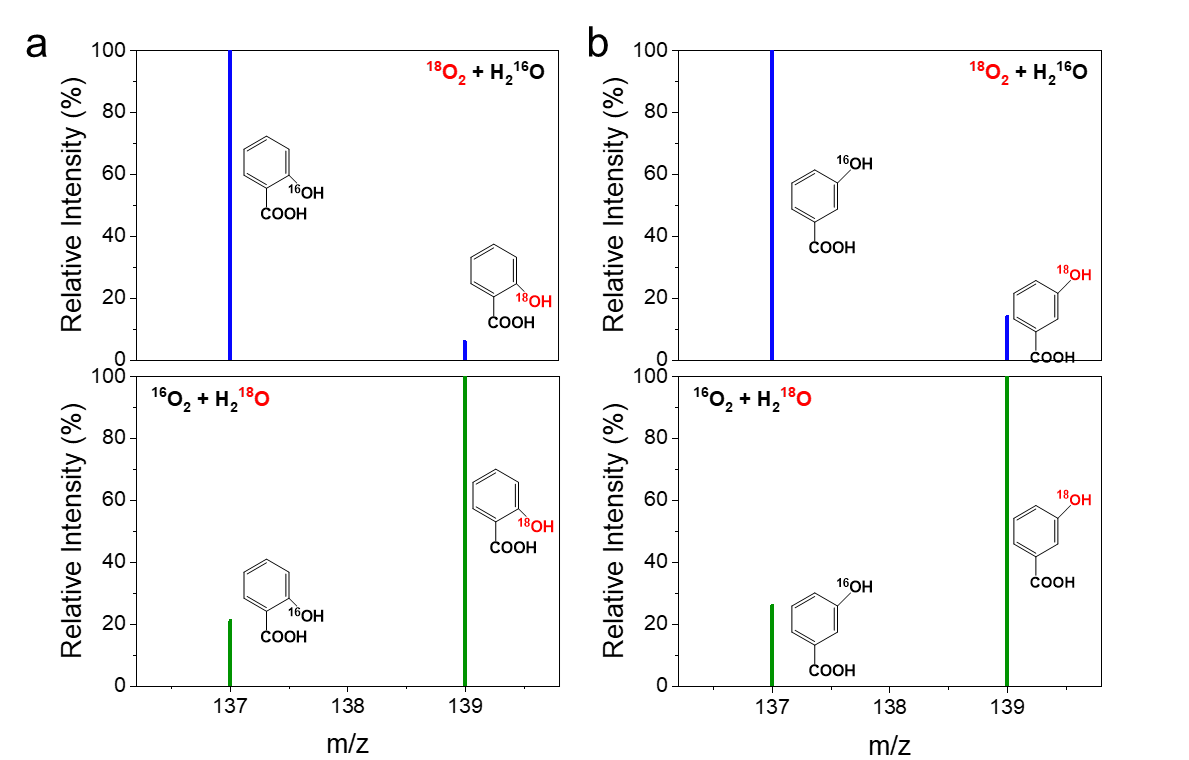
**

**Supplementary Fig. 31. 18O isotopic studies on the origins of •OH radicals over Au/TiO2@pSiO2-1.7.** Benzoic acid (BA) was used as a probe to in situ capture •OH, resulting in the formation of hydroxybenzoic acid. a, Mass spectra of 2-hydroxybenzoic acid. b, Mass spectra of 3-hydroxybenzoic acid. The mass spectra of 4-Hydroxybenzoic acid was shown in Fig. 4c.

Reaction conditions: 2mg Catalyst, 1 mL 1 mM BA/H218O + 16O2 bubbling or 1 mL 1 mM BA/H216O + 18O2 bubbling , UV 10 min.

**
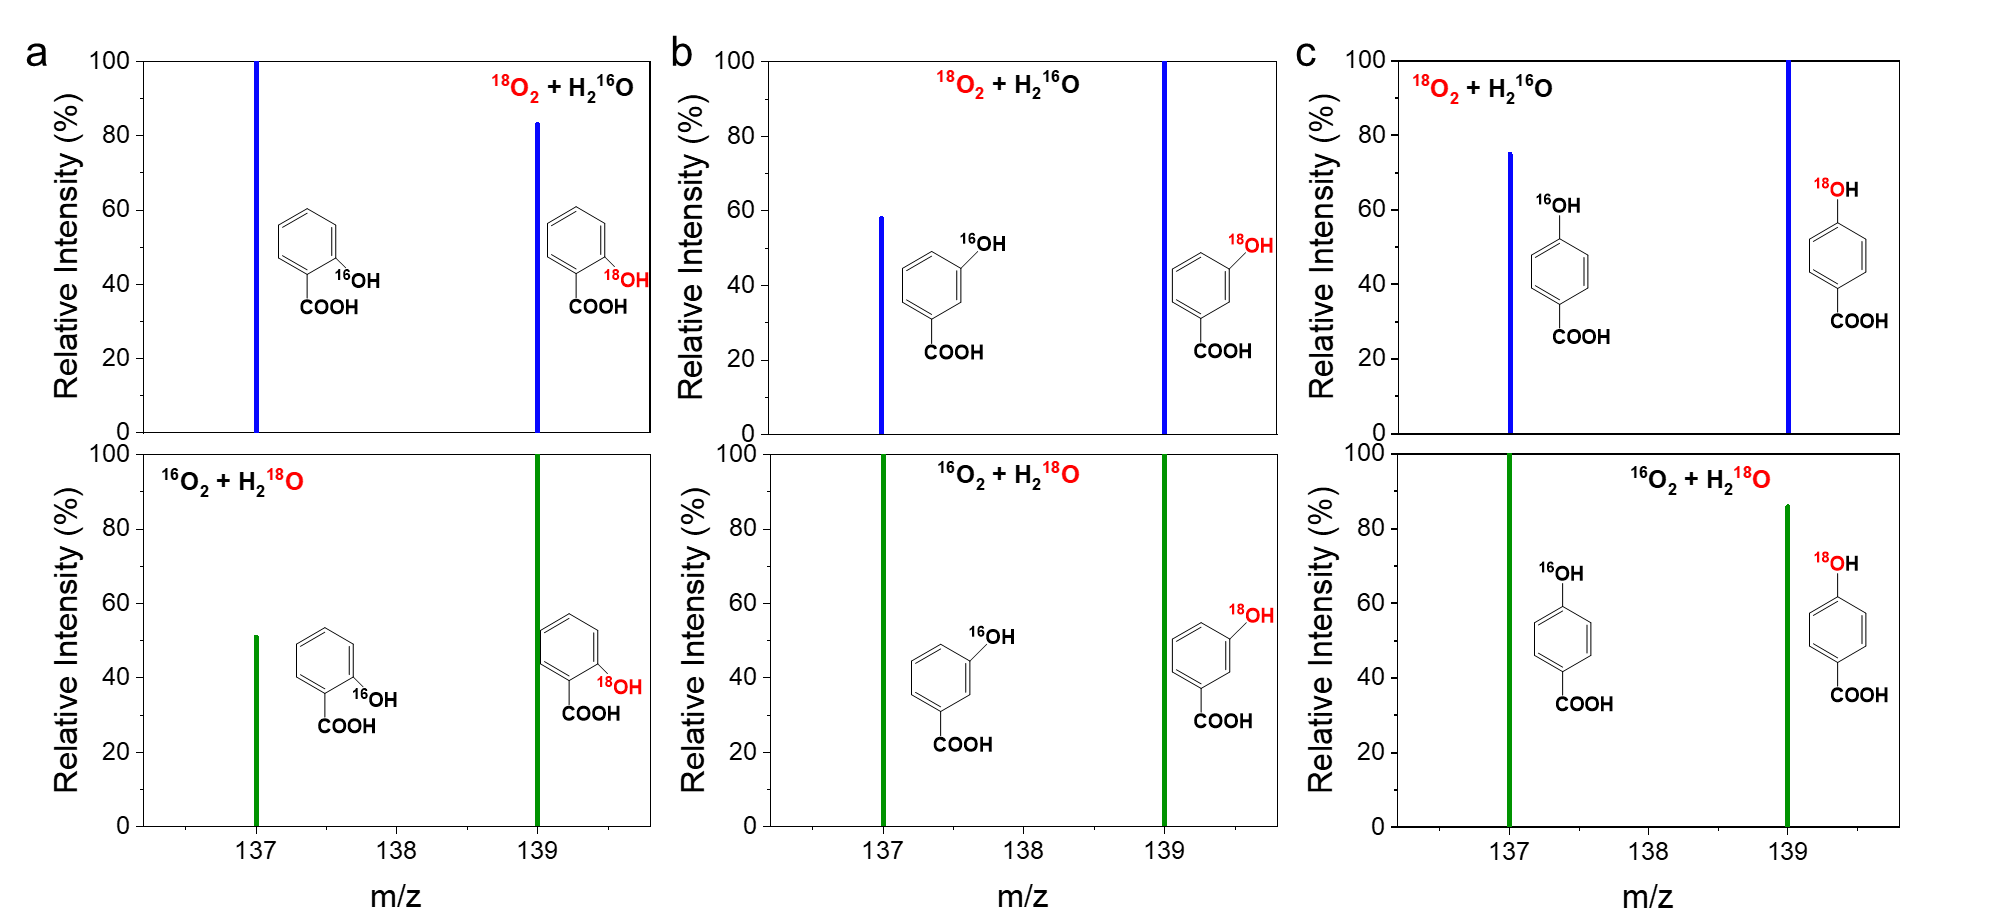
**

**Supplementary Fig. 32. 18O isotopic studies on the origins of •OH radicals over Au/TiO2**. Benzoic acid (BA) was used as a probe to in situ capture •OH, resulting in the formation of hydroxybenzoic acid **a**, Mass spectra of 2-hydroxybenzoic acid. **b**, Mass spectra of 3-hydroxybenzoic acid. **c**, Mass spectra of 4-hydroxybenzoic acid. Reaction conditions: 2 mg Catalyst, 1 mL 1 mM BA/H218O + 16O2 bubbling or 1 mL 1 mM BA/H216O + 18O2 bubbling, UV 10 min.

**Note**: Under both BA/H216O + 18O2 and BA/H218O + 16O2 conditions, we observed roughly equal signnals for H16OC6H4CO2H (m/z=137) and H18OC6H4CO2H (m/z=139). This suggest that both H2O and O2 contribute for •OH radical generation over Au/TiO2, in stark contrast to our findings for Au/TiO2@pSiO2.


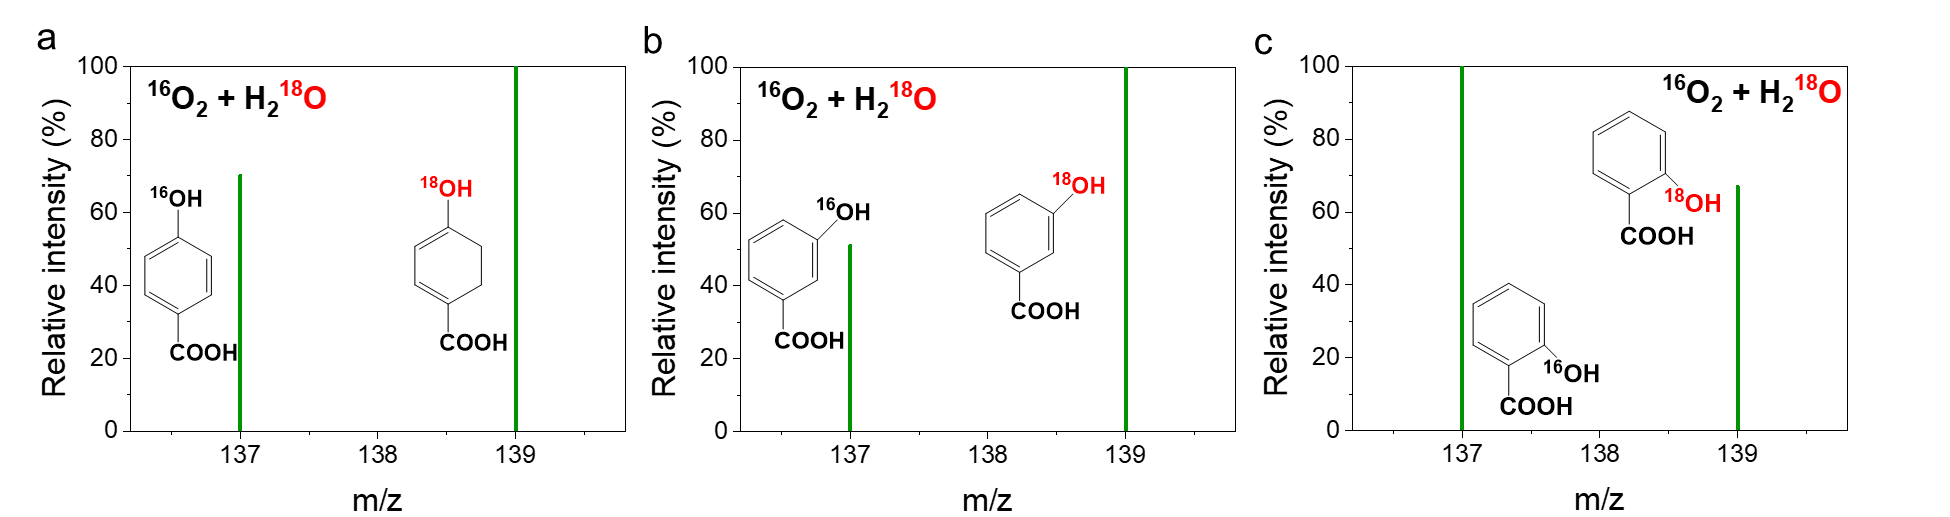


**Supplementary Fig. 33. 18O isotopic studies on the origins of •OH radicals over TiO2**. Benzoic acid (BA) was used as a probe to in situ capture •OH, resulting in the formation of hydroxybenzoic acid **a**, Mass spectra of 4-hydroxybenzoic acid. **b**, Mass spectra of 3-hydroxybenzoic acid. **c**, Mass spectra of 2-hydroxybenzoic acid. Reaction conditions: 2 mg catalyst, 1 mL 1 mM BA/H218O + 16O2 bubbling, UV 10 min.


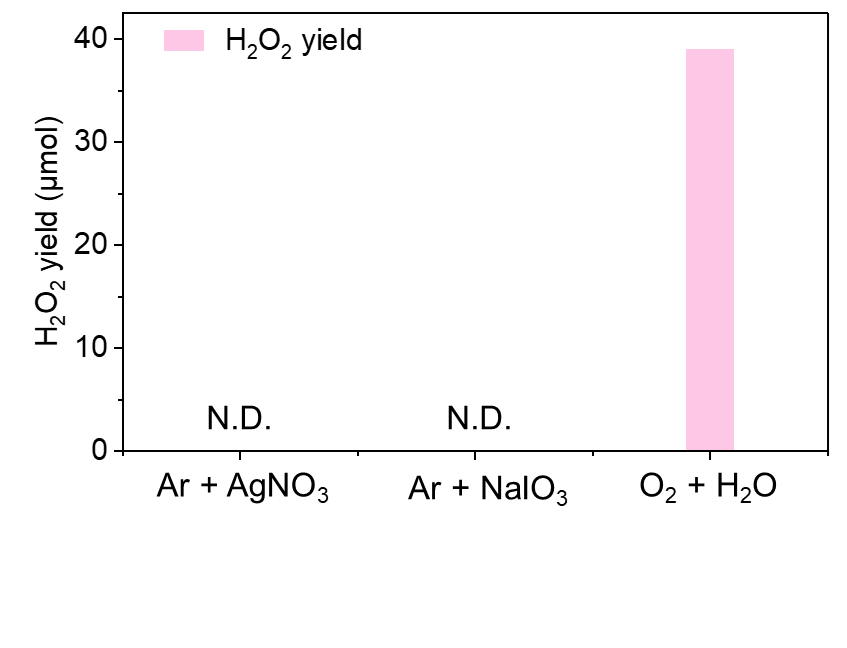


**Supplementary Fig. 34**. **H2O2 production over Au/TiO2@pSiO2-1.7 with addition of electron acceptor (10 mM AgNO3 or NaIO3 aqueous solution) under Ar atmosphere.** Reaction conditions: 10 mg Catalysts, 5 mL H2O or 1 mM AgNO3, 1 mM NaIO3, 1 MPa O2 or 1 MPa Ar, 1 h reaction time, reaction temperature of 25 °C, light source of 365 nm UV LED, 79.6 mW/cm2.

N.D. (not detected) means that H2O2 cannot be detected in the photocatalytic system.





**Supplementary Fig. 35**. **Comparison of H2O2 decomposition rates over different photocatalysts.** The initial amount of H2O2 is 500 μmol. Reaction conditions: 10 mg Catalysts, 50 mL 10 mM H2O2, 2 MPa Ar, 900 s reaction time, reaction temperature of 25 °C, light source of 365 nm UV LED 79.6 mW/cm2.

**Note**: After 1 hour of UV irradiation, less than 10% of H2O2 decomposes over Au/TiO2@pSiO2-1.7, whereas nearly all H2O2 is decomposed over Au/TiO₂.


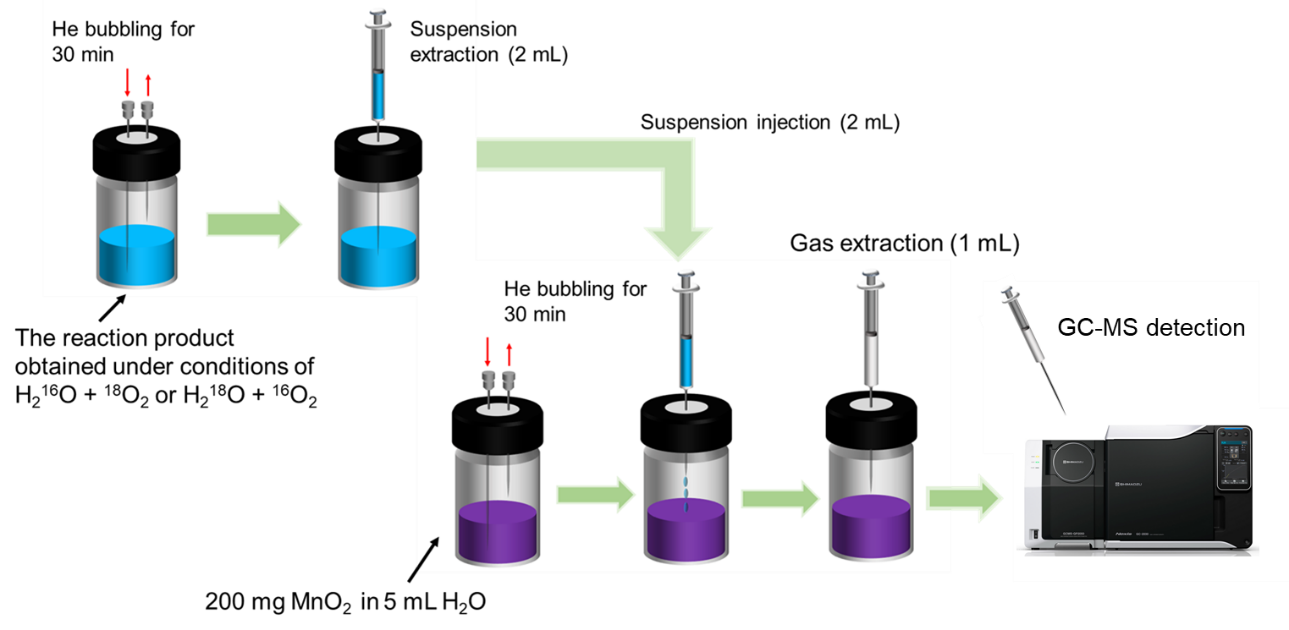


**Supplementary Fig. 36. Schematic illustrating the isotopic experimental procedure used to identify the oxygen source in H2O2 production.**


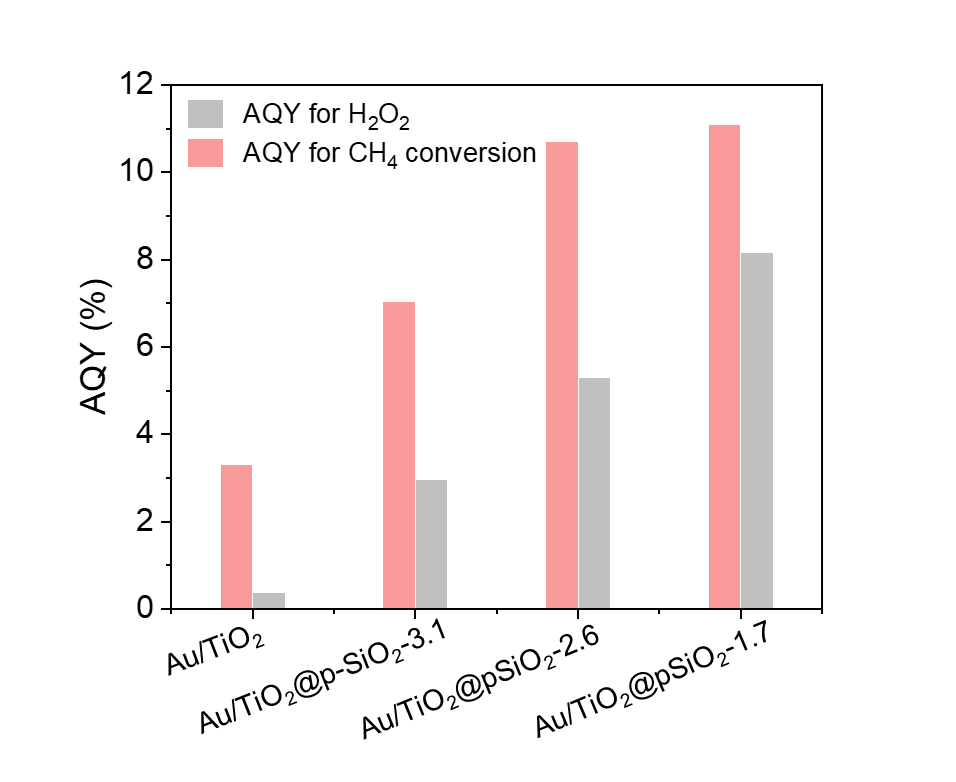


**Supplementary Fig. 37. AQY calculation for different photocatalysts.**


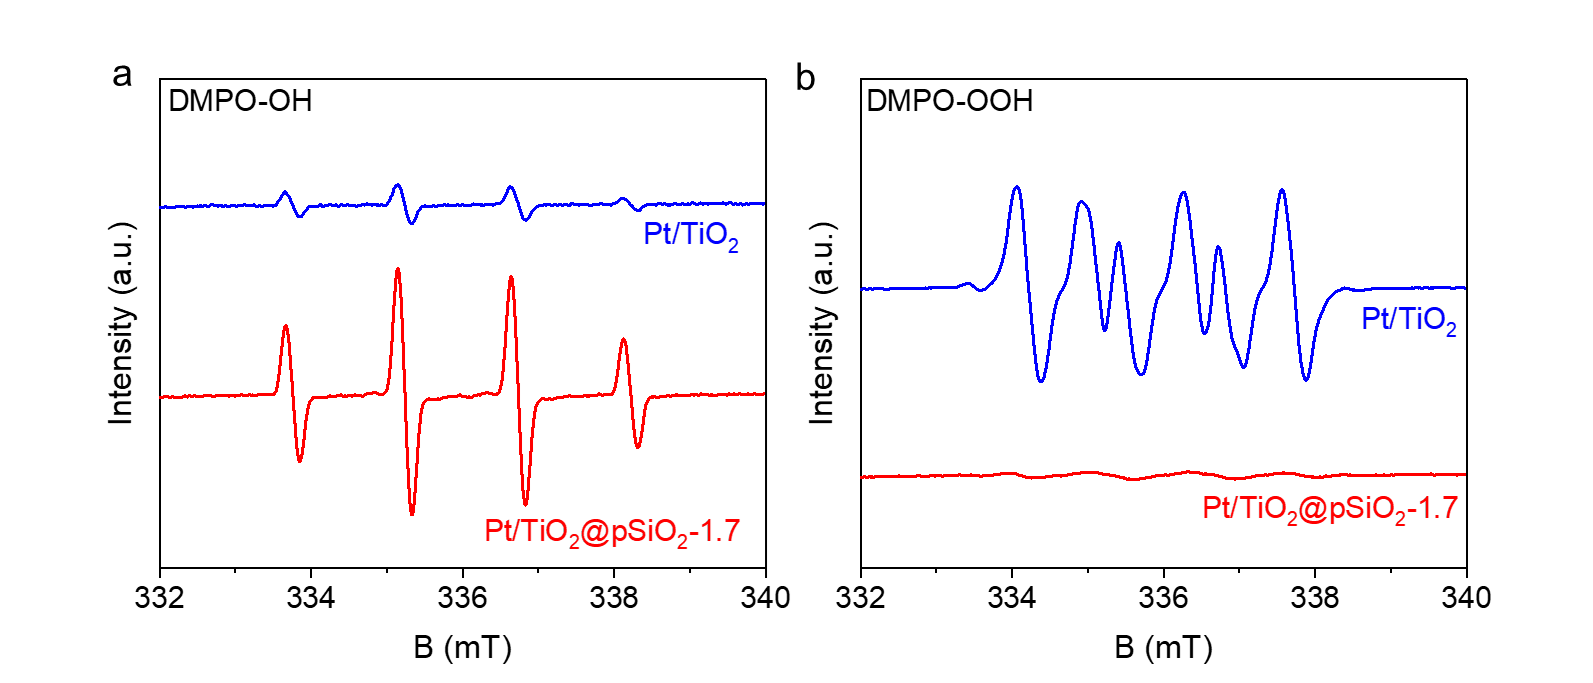


**Supplementary Fig. 38. In situ EPR spectra for •OH and •OOH radical detection over Pt/TiO2 and Pt/TiO2@pSiO2-1.7. a,** EPR spectra for DMPO-OH. **b,** EPR spectra for DMPO-OOH.


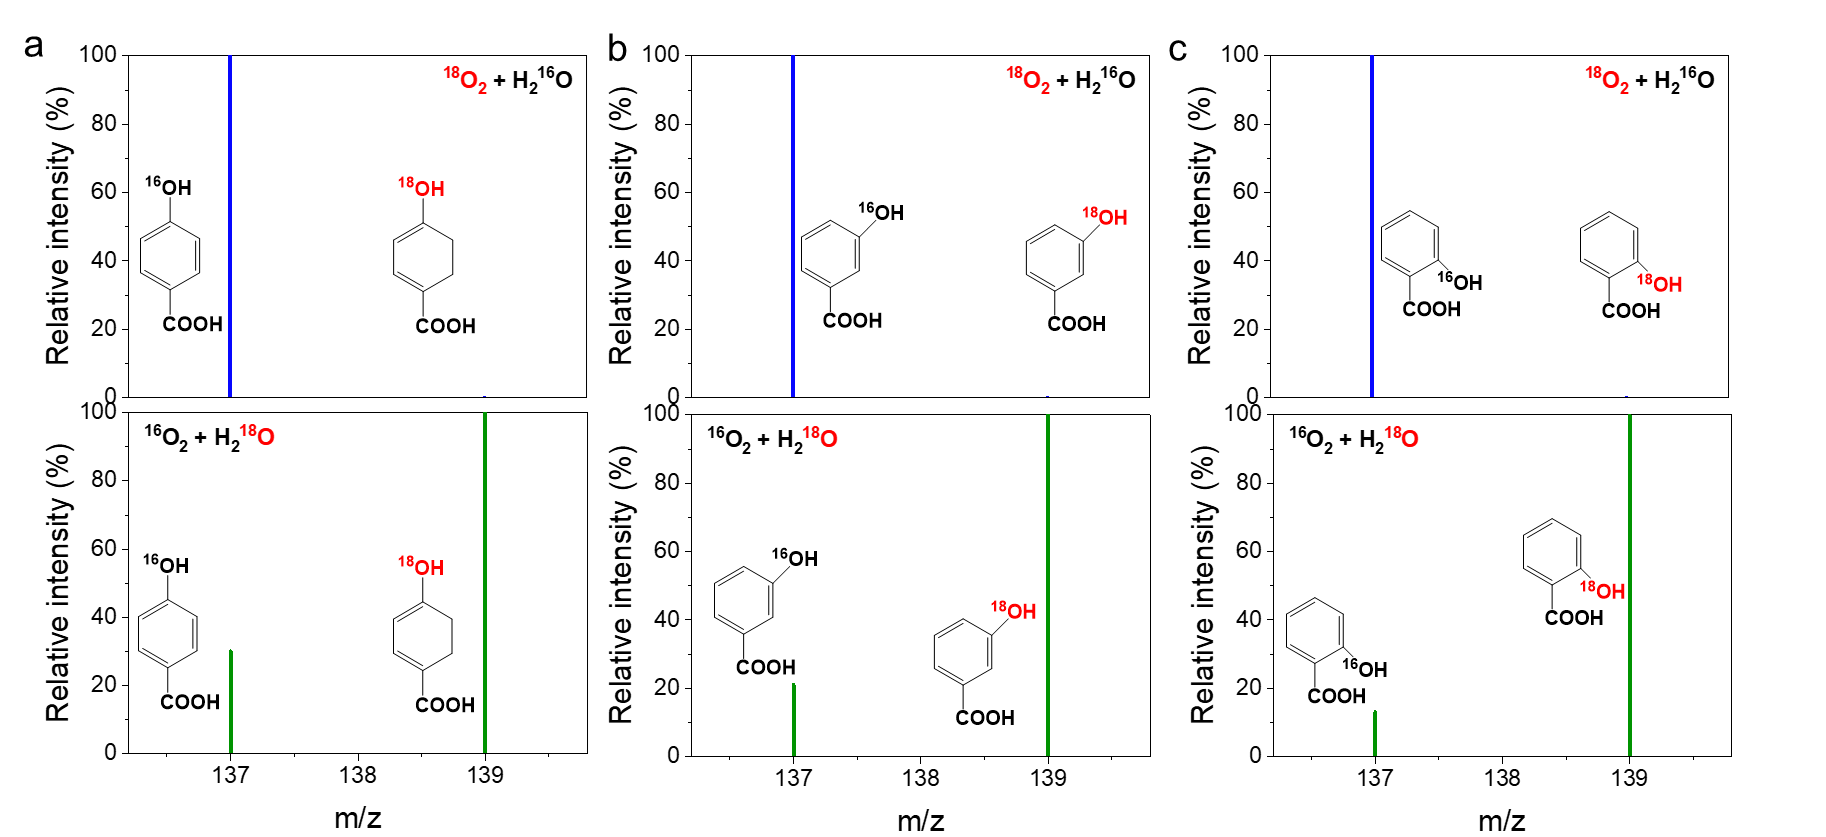


**Supplementary Fig. 39. 18O isotopic studies on the origins of •OH radicals over Pt/TiO2@pSiO2-1.7 catalyst**. Benzoic acid was used as a probe to in situ capture •OH, resulting in the formation of hydroxybenzoic acid **a**, Mass spectra of 4-hydroxybenzoic acid. **b**, Mass spectra of 3-hydroxybenzoic acid. **c**, Mass spectra of 2-hydroxybenzoic acid. Reaction conditions: 2 mg catalyst, 1 mL 1 mM BA/H218O + 16O2 bubbling or 1 mL 1 mM BA/H216O + 18O2 bubbling, UV 10 min.

**Note**: Under BA/H216O + 18O2 conditions, only products of H16OC6H4CO2H (m/z=137) were observed; with BA/H218O + 16O2,roughly80% of products corresponds to H18OC6H4CO2H (m/z=139). These results suggest that both H2O is the major contributor for •OH radical generation over Pt/TiO2@pSiO2.


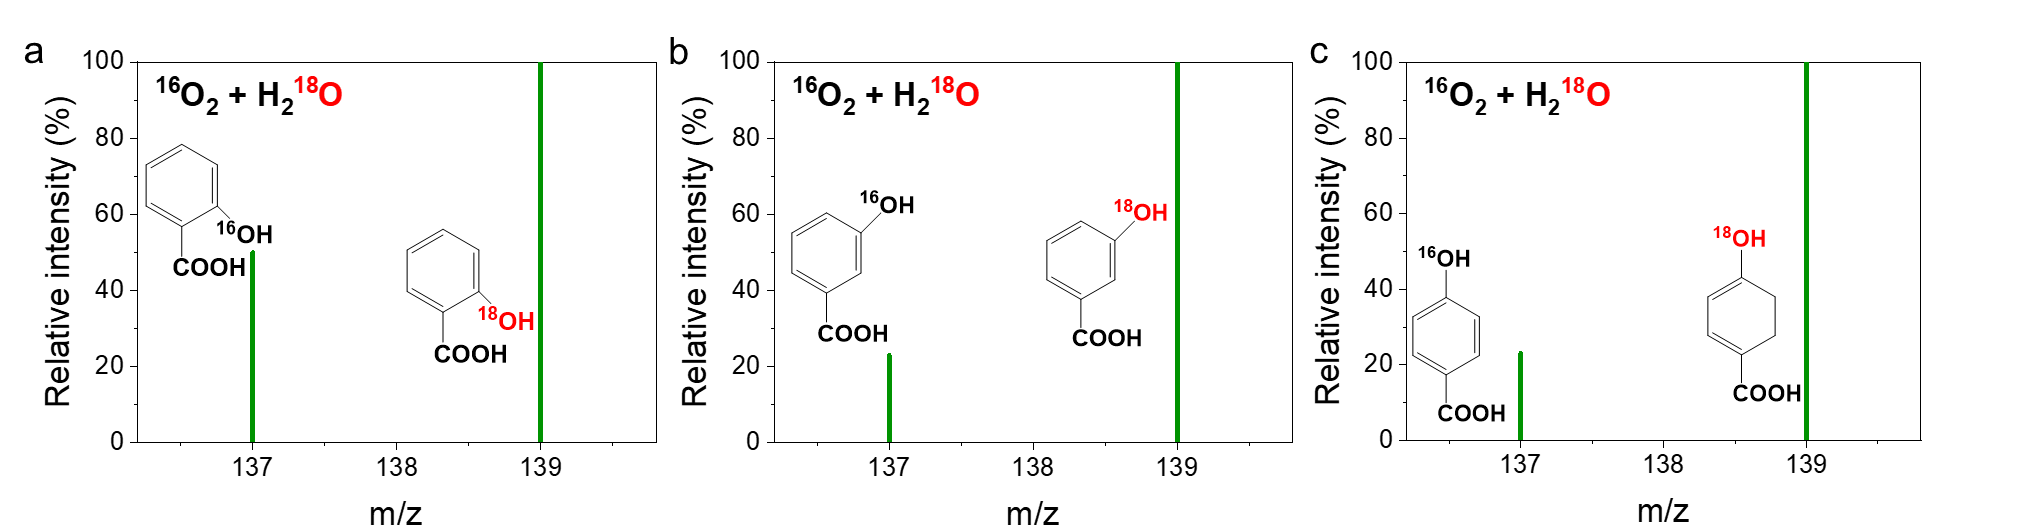


**Supplementary Fig. 40. 18O isotopic studies on the origins of •OH radicals over Pt/TiO2**. Benzoic acid was used as a probe to in situ capture •OH, resulting in the formation of hydroxybenzoic acid **a**, Mass spectra of 2-hydroxybenzoic acid. **b**, Mass spectra of 3-hydroxybenzoic acid. **c**, Mass spectra of 4-hydroxybenzoic acid. Reaction conditions: 2 mg catalyst, 1 mL 1 mM BA/H218O + 16O2 bubbling, UV 10 min.


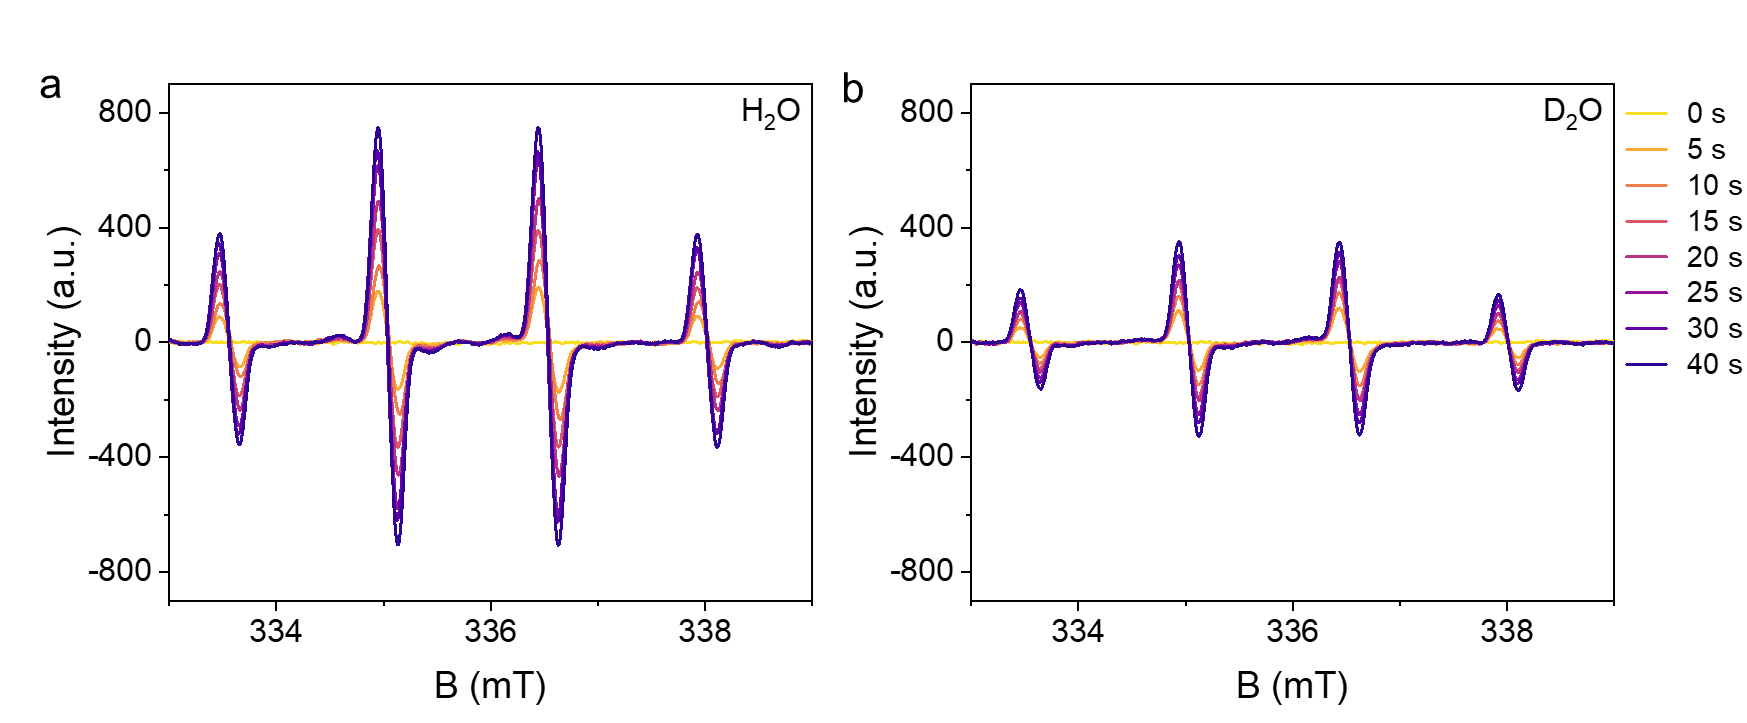


**Supplementary Fig. 41. KIE study on •OH radical production from WOR over Au/TiO2@pSiO2-1.7. a, b,** In situ EPR spectra for monitoring •OH radical generation in H2O (a) and D2O (b).


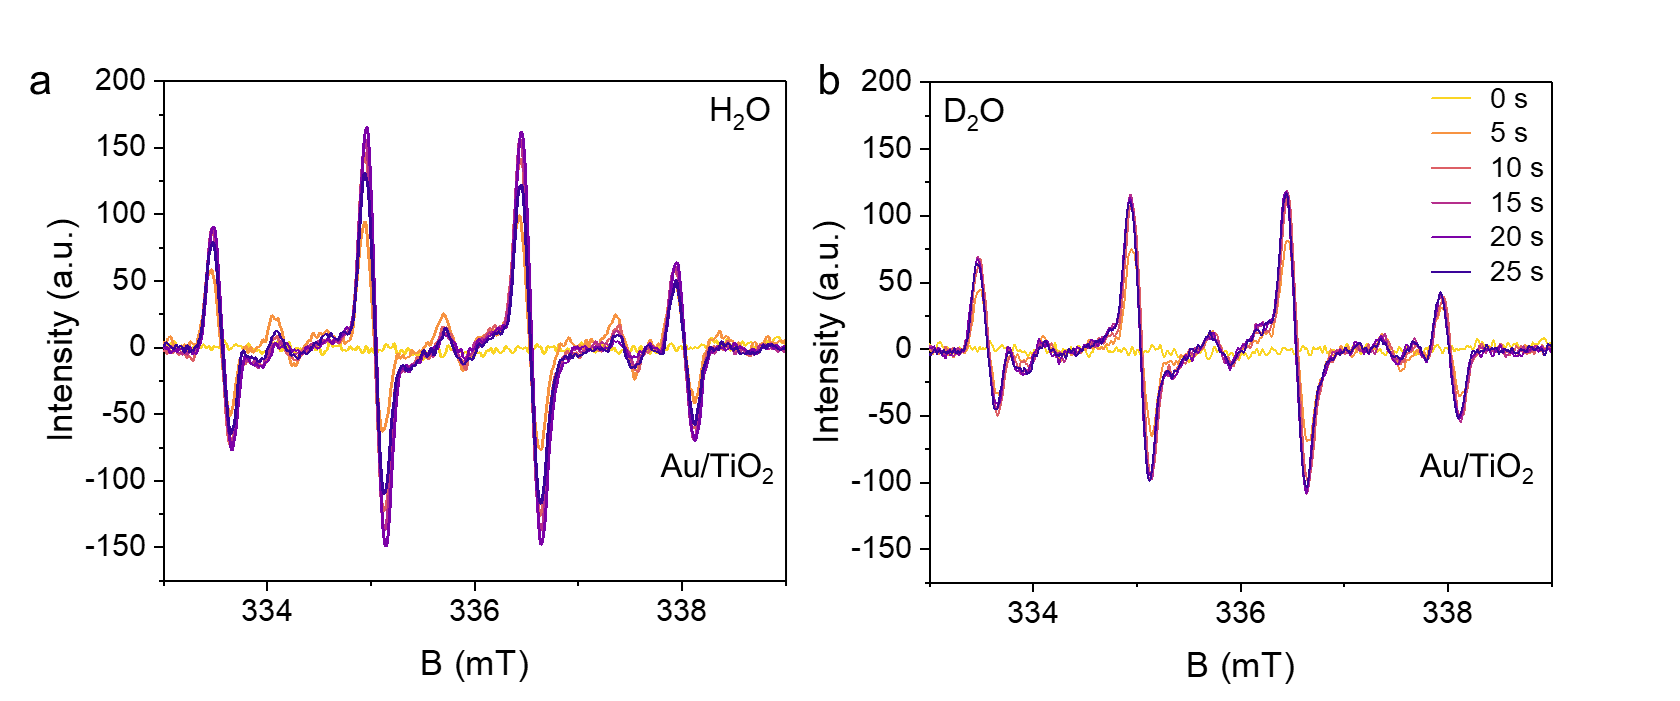


**Supplementary Fig. 42. KIE study on •OH radical production from WOR over Au/TiO2. a, b,** In situ EPR spectra for monitoring •OH radical generation in H2O (a) and D2O (b).


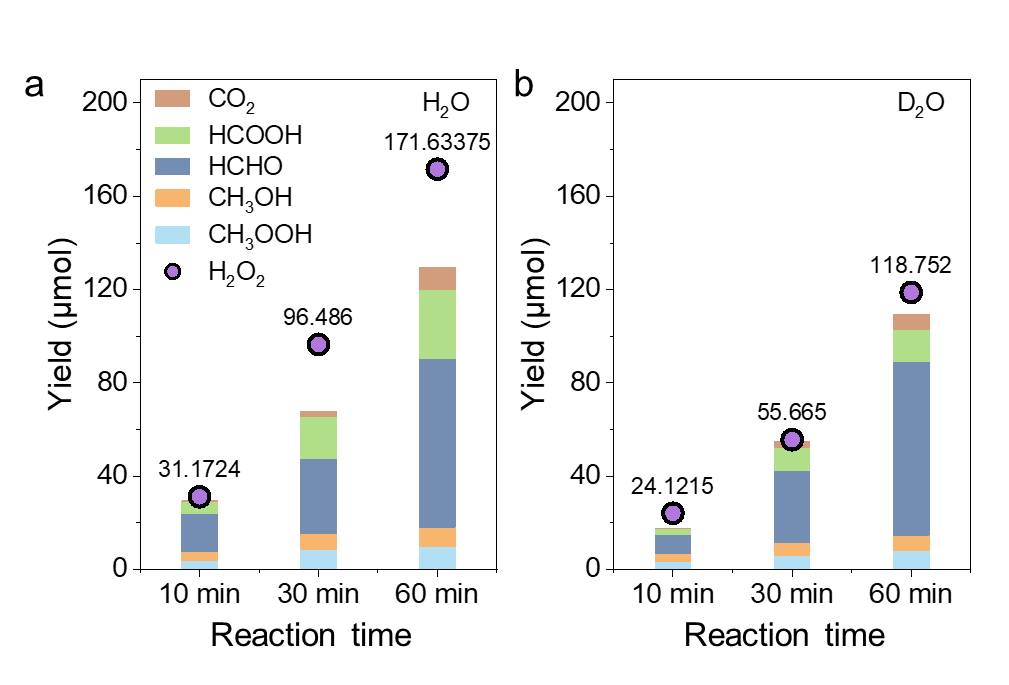


**Supplementary Fig. 43. Photocatalytic CH4 conversion over Au/TiO2@pSiO2-1.7 in H2O and D2O**. **a**, Oxygenate yields and H2O2 yields in H2O. **b**, Oxygenate yields and H2O2 yields in D2O. Reaction conditions: 10 mg Catalyst, 10 mL H2O or D2O, UV LED, 2.5 MPa CH4, 1MPa O2.


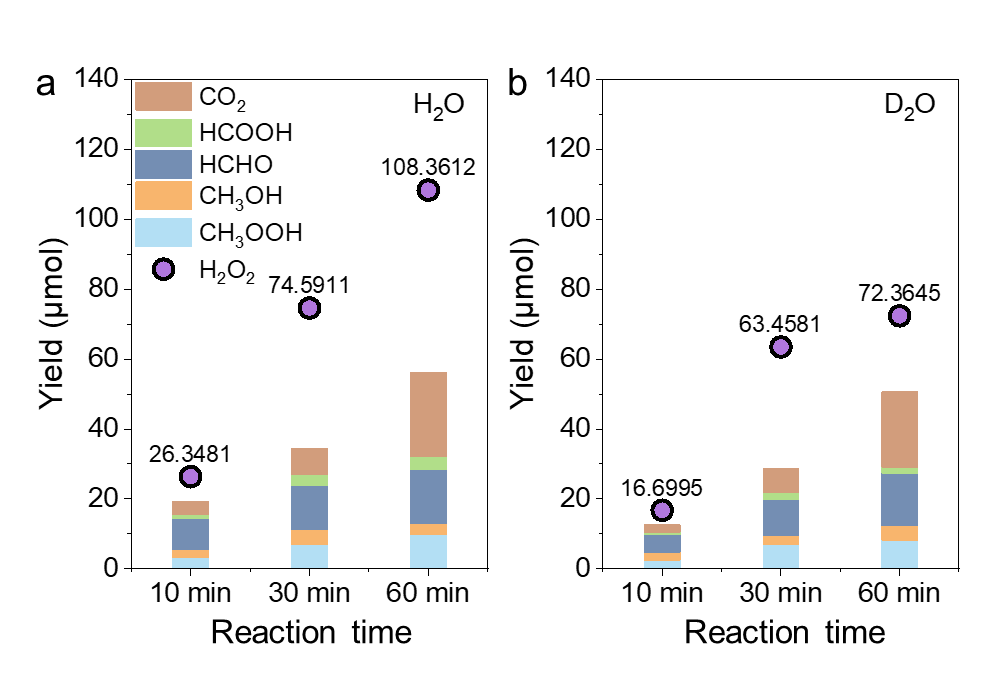


**Supplementary Fig. 44. Photocatalytic CH4 conversion over Au/TiO2@pSiO2-3.1 in H2O and D2O**. **a**, Oxygenate yields and H2O2 yields in H2O. **b**, Oxygenate yields and H2O2 yields in D2O. Reaction conditions: 10 mg Catalyst, 10 mL H2O or D2O, UV LED, 2.5 MPa CH4, 1MPa O2.


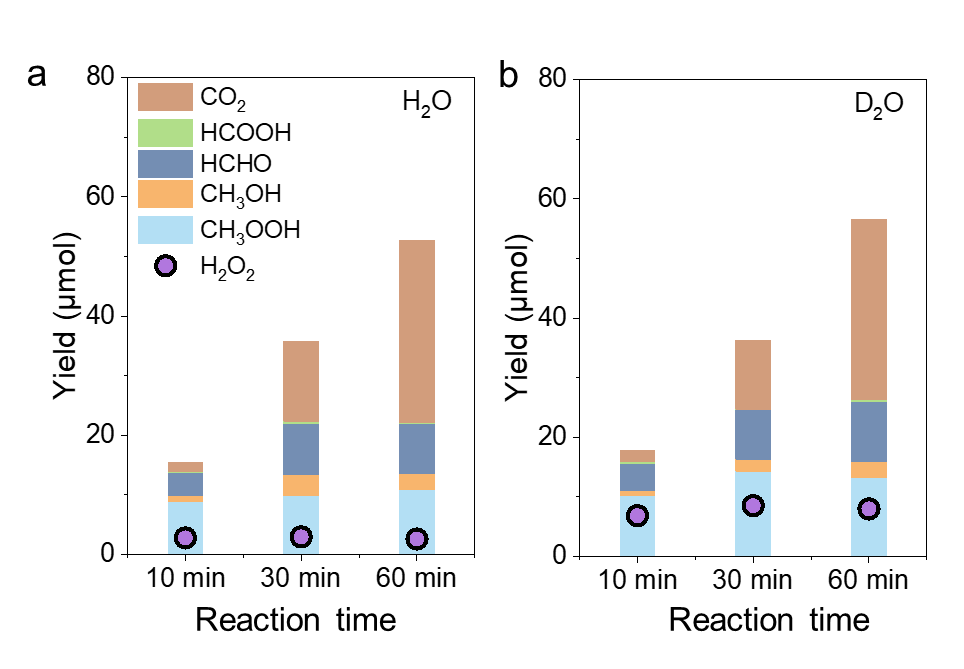


**Supplementary Fig. 45. Photocatalytic CH4 conversion over Au/TiO2 in H2O and D2O**. **a**, Oxygenate yields and H2O2 yields in H2O. **b**, Oxygenate yields and H2O2 yields in D2O. Reaction conditions: 10 mg Catalyst, 10 mL H2O or D2O, UV LED, 2.5 MPa CH4, 1MPa O2.


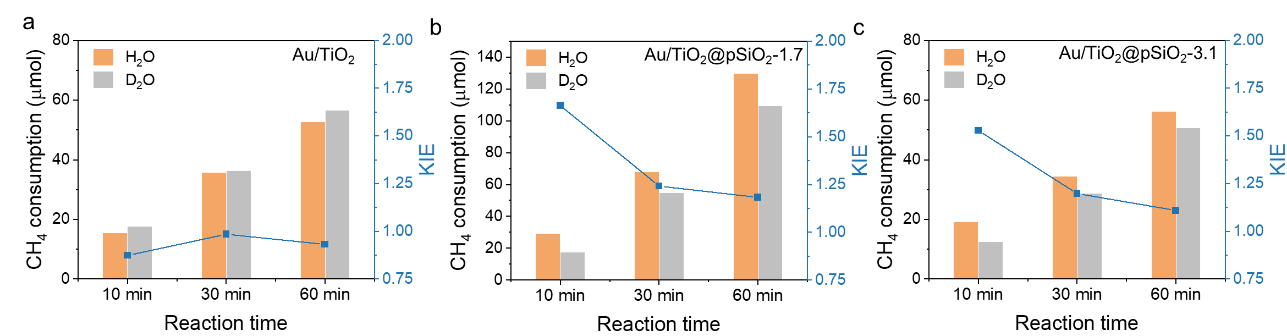


**Supplementary Fig. 46. KIE study on CH4 conversion**. **a-c**, CH4 consumption under different light irradiation times on Au/TiO2 (a), Au/TiO2@pSiO2-1.7 (b), and Au/TiO2@pSiO2-3.1 (c). Reaction conditions: 10 mg catalyst, 10 mL H2O or D2O, 2.5 MPa CH4, 1 MPa O2, UV LED as light source.


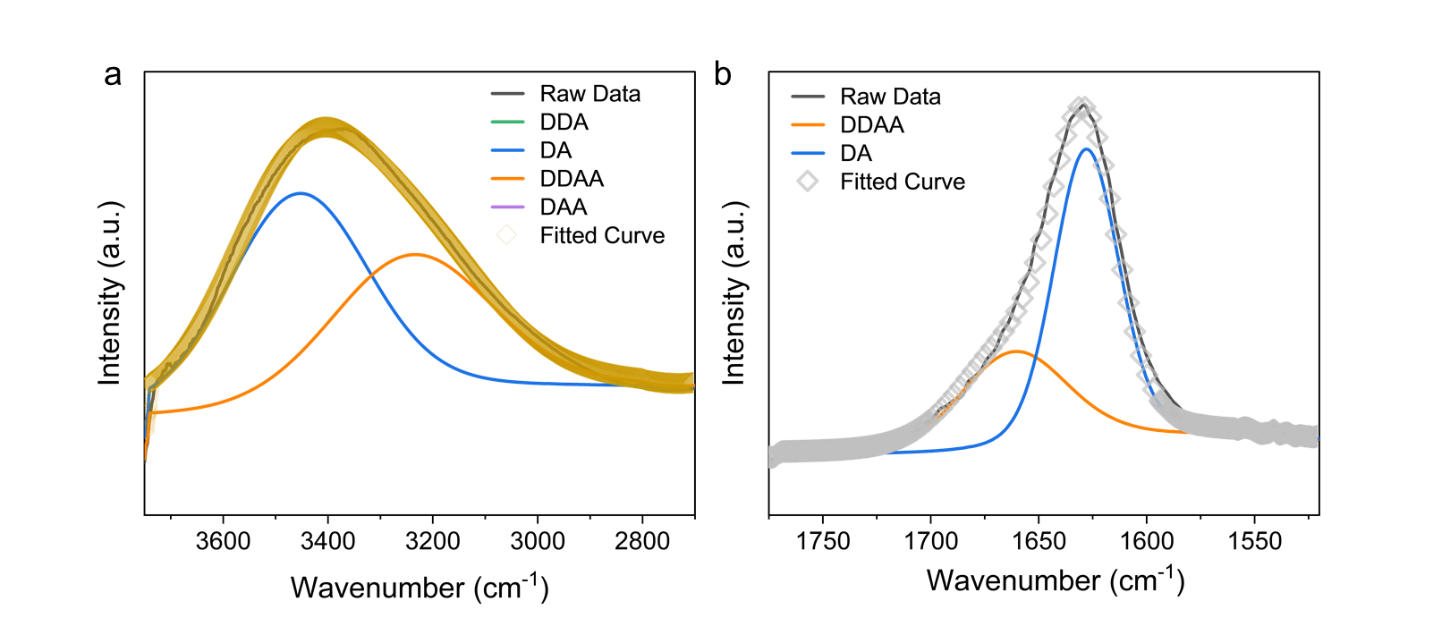


**Supplementary Fig. 47. Fourier Transform Infrared analysis of Au/TiO2@pSiO2-1.7 at RH = 8.9%.** a, Gaussian deconvolution of the OH stretching band of the water within the pores. b, Gaussian deconvolution of the HOH bending band of the water within the pores.


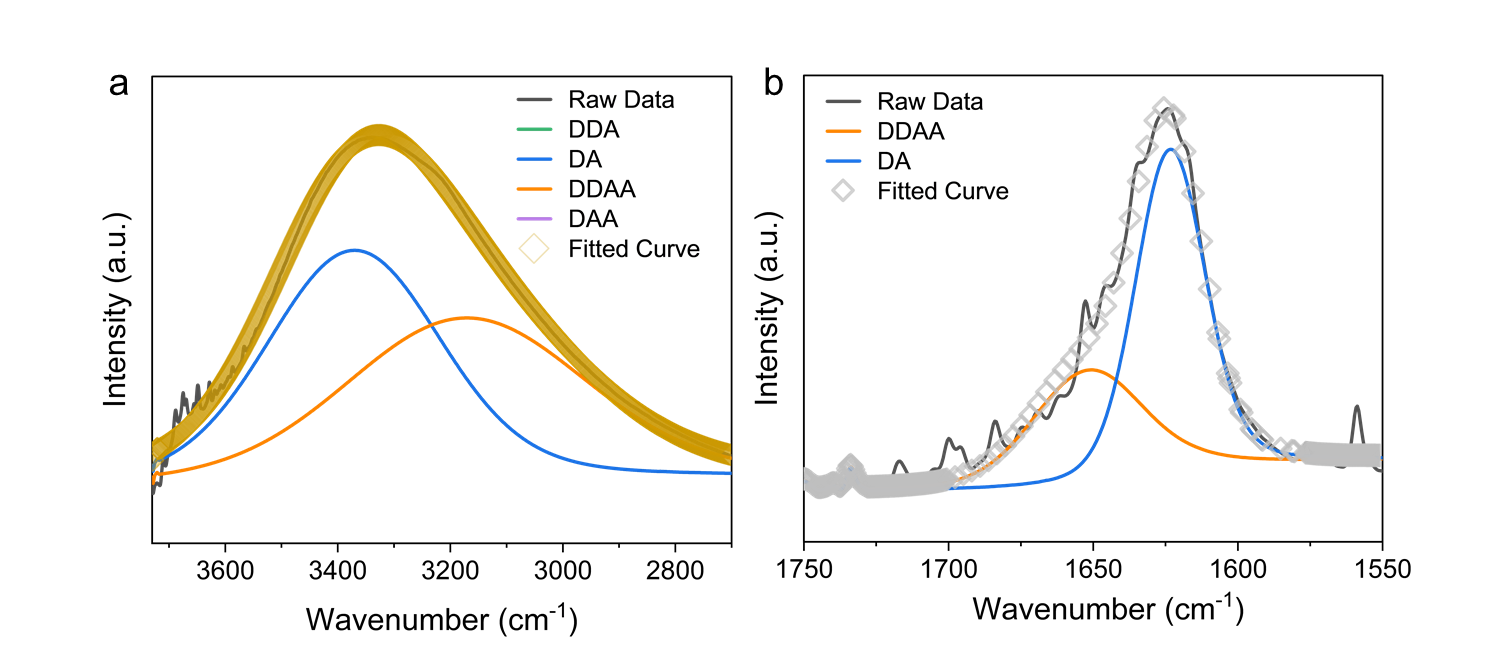


**Supplementary Fig. 48. Fourier Transform Infrared analysis of Au/TiO2@pSiO2-3.1 at RH = 8.9%.** a, Gaussian deconvolution of the OH stretching band of the water within the pores. b, Gaussian deconvolution of the HOH bending band of the water within the pores.

**Supplementary Table 1.** N2 physisorption data for different catalysts.

| Catalysts | Specific surface area(m2/g) | Pore size(nm) |
| --- | --- | --- |
| Au/TiO2@pSiO2-3.1 | 339.639 | 3.1 |
| Au/TiO2@pSiO2-2.6 | 440.605 | 2.6 |
| Au/TiO2@pSiO2-1.7 | 562.633 | 1.7 |
| Au/TiO2 | 70.605 | - |
| Au/TiO2@SiO2 | 20.74 | - |
| pSiO2-1.7 | 433.49 | 1.7 |

**Supplementary Table 2.** ICP-OES results of different photocatalysts.

| Catalysts | Metal mass loading (%) |
| --- | --- |
| Au/TiO2@pSiO2-1.7 | 0.083 |
| Au/TiO2@pSiO2-2.6 | 0.082 |
| Au/TiO2@pSiO2-3.1 | 0.104 |
| Au/TiO2 | 0.092 |
| Au/TiO2@SiO2 | 0.11 |

**Supplementary Table 3.** Product yields of various catalysts for direct oxidation of CH4 using O2 as the oxidant in water.

| **Entry** | **Catalysts** | **Amounts of products from CH4 (μmol)** | | | | | **All products (μmol)** | **H2O2 Product**  **(μmol)** |
| --- | --- | --- | --- | --- | --- | --- | --- | --- |
| CH3OOH | CH3OH | HCHO | HCOOH | CO2 |
| 1 | Au/TiO2@pSiO2-1.7 | 58.0 | 35.3 | 154.4 | 26.8 | 7.8 | 282.3 | 446.0 |
| 2 | Au/TiO2@pSiO2-2.6 | 55.1 | 34.9 | 133.6 | 37.5 | 8.9 | 270.0 | 289.5 |
| 3 | Au/TiO2@pSiO2-3.1 | 50.4 | 35.7 | 88.8 | 5.0 | 14.6 | 194.6 | 161.4 |
| 4 | Au/TiO2@SiO2 | 36.6 | 15.9 | 65.6 | 8.8 | 7.5 | 134.4 | 154.0 |
| 5 | Au/TiO2 | 59.9 | 11.0 | 21.6 | 0 | 17.7 | 110.2 | 20.4 |
| 6 | Pt/TiO2@pSiO2-1.7 | 41.1 | 56.2 | 212.5 | 17.4 | 15.4 | 342.7 | 79.8 |
| 7 | Pt/TiO2 | 1.3 | 53.4 | 9.1 | 5.0 | 79.3 | 148.1 | 0 |
| 8 | Au/TiO2 + pSiO2-1.7 physical mixture | 60.4 | 6.6 | 13.8 | 0 | 6.7 | 87.6 | 5.0 |
| 9a | Au/TiO2@pSiO2-1.7 | 0 | 0 | 0 | 0 | 0 | 0 | 0 |
| 10b | Au/TiO2@pSiO2-1.7 | 0 | 0 | 0 | 0 | 0 | 0 | 0 |
| 11c | - | 0 | 0 | 0 | 0 | 0 | 0 | 0 |

Reaction condition (unless specified): 10 mg catalysts, 100 mL H2O, 2.5 MPa CH4, 1.0 MPa O2, 25±3 ᵒC reaction temperature, 1h reaction time, light source: 365nm UV LED with light intensity of 80 mW/cm2.

a Entry 9: reaction is conducted without light illumination (dark condition)

b Entry 10: 2.5 MPa Ar gas instead of CH4 (No CH4 in the system)

c Entry 11: no catalyst used

**Supplementary Table 4.** Apparent Quantum yield (AQY) of CH4 oxidation for various photocatalysts.

| **Catalysts** | **N(photons)a** | **Amount of products (μmol)** | | | | | **AQY**  **(%)** |
| --- | --- | --- | --- | --- | --- | --- | --- |
| CH3OOH | CH3OH | HCHO | HCOOH | CO2 |
| Pt/TiO2@pSiO2-1.7 | 79.6 | 41.1 | 56.2 | 212.5 | 17.4 | 15.4 | 14.1 |
| Au/TiO2@pSiO2-1.7 | 79.6 | 58.0 | 35.3 | 154.4 | 26.8 | 7.8 | 10.9 |
| Au/TiO2@pSiO2-2.6 | 79.6 | 55.1 | 34.9 | 133.6 | 37.5 | 8.9 | 10.7 |
| Au/TiO2@pSiO2-3.1 | 79.6 | 50.4 | 35.7 | 88.8 | 5.0 | 14.6 | 7.0 |
| Au/TiO2 | 79.6 | 59.9 | 11.0 | 21.6 | 0 | 17.7 | 3.3 |
| Pt/TiO2 | 79.6 | 1.3 | 53.4 | 9.1 | 5.0 | 79.3 | 8.8 |

Reaction conditions: 10 mg catalysts, 2.5 MPa CH4, 1 MPa O2, 100 mL H2O, 1 h reaction time, reaction temperature of 25 °C, light source: 365 nm UV LED, 80 mW/cm2.

a Light intensity: 80 mW/cm2, irradiation area: 12.56 cm2, light incident time: 1h

**Supplementary Table 5** Comparison of H2O2 production over different photocatalysts.

| **Photocatalyst** | **Solvent** | **Gas** | **λ**  **(nm)** | **H2O2 rate**  **(mmol g–1 h–1)** | **H2O2 conc. (mM g–1 h–1)** | **AQY**  **(%)** | **Ref** |
| --- | --- | --- | --- | --- | --- | --- | --- |
| Au/TiO2@pSiO2-1.7 | H2O | O2 | 365 | 44.6 | 446.0 | 8.2  (365 nm) | This work |
| Nano-BZT | H2O | O2 | > 420 | 1.5 | 2.9 | - | 7 |
| Pd/APTMS/TiO2 | PBS buffer | Air | - | 2.7 | 270.0 | 0.23 | 8 |
| Pt/TiO2 | H2O | - | AM 1.5G | 5.1 | 255.0 | - | 9 |
| PF2FBT/  TiO2 | H2O | O2 | > 420 | 0.1 | 2.2 | 0.3  (420 nm) | 10 |
| EBA-COF | H2O /EtOH (9:1) | O2 | 420 | 1.8 | 732.0 | 4.4  (420nm) | 11 |
| TPB-DMTP* | H2O | O2 | > 420 | 1.6 | 31.0 | 18.4  (420nm) | 12 |
| CoPc-BTM-COF | H2O /EtOH (9:1) | O2 | > 400 | 2.1 | 42 | 7.2  (630 nm) | 13 |
| DMCR-1NH | H2O/IPA (10:1) | O2 | 420-700 | 2.6 | 129.0 | 10.2  (420 nm) | 14 |
| TpDz | H2O | O2 | > 420 | 7.3 | 407.0 | 11.9  (420 nm) | 15 |
| Hz-TP-BT-COF | H2O | Air | 420-600 | 5.7 | 378.0 | 17.5  (420nm) | 16 |
| few-layered C3N4 (fl-CN) | H2O/EtOH  (9:1) | O2 | 420-780 | 0.95 | 19.4 | 9.0  (420 nm) | 17 |
| Sb-SAPC15 | H2O | O2 | > 420 | 0.6 | 12.0 | 17.6  (420 nm) | 18 |
| MIL-125-R | H2O /BnOH  (2:5) | O2 | > 420 | 1.0 | 500.0 | - | 19 |
| CoOx/Mo:  BiVO4/Pd | PBS buffer | O2 | AM 1.5G | 8.6 | 713.0 | 5.8  (420 nm) | 20 |

**Supplementary Table 6.** Performance comparison of photocatalytic CH4 oxidation with O2 over different photocatalysts.

| **Catalysts** | **Reaction conditions** | **Oxygenate yield**  **(μmol g-1 h-1)** | **Selectivity**  **(%)** | **AQY(%)** | **Ref** |
| --- | --- | --- | --- | --- | --- |
| Pt/TiO2@pSiO2-1.7 | 2.5 MPa CH4, 1 MPa O2, 25 ºC | 32728.9 | 94.6 | 14.1  (365nm) | This work |
| Au/TiO2@pSiO2-1.7 | 2.5 MPa CH4, 1 MPa O2, 25 ºC | 27441.0 | 97.2 | 10.9  (365nm) | This work |
| Au-CoOx/TiO2 | 20 bar CH4, 1bar O2, 25 ºC | 2540.0 | 95.0 | 1.2  (368 nm) | 1 |
| Cu-def-WO3 | 20 bar CH4, 0.1 MPa O2, 25 °C | 2489.5 | 100 | 1.14  (420 nm) | 21 |
| Au/In2O3 | 20 bar CH4, 10 bar O2, 25 ºC | 2030.0 | 97.6 | 1.4  (365 nm) | 22 |
| N-doped TiO2 | 19 bar CH4, 1 bar O2, 25°C | 25926.0 | 99.0 | 1.4  (365 nm) | 23 |
| TiO2@SiO2-AuPd | 6.9 bar CH4, 2.75 bar O2, 25 ºC | 15400.0 | 94.5 | 2.45  (365 nm) | 5 |
| Ni-NC/TiO2 | 20 bar CH4, 1bar O2, 25ºC | 730.0 | 93.0 | 1.9  (360 nm) | 24 |
| AC-Co1/PCN | 8 bar CH4, 25°C | 312.5 | 99.9 | 3.51  (365 nm) | 25 |
| Ru1Ox/ZnO | 2.0 MPa CH4, 0.1 MPa O2, 25 °C | 353.0 | 100.0 | 5.1  (320 nm) | 26 |
| q-BiVO4 | 10 bar CH4, 10 bar O2, 25 ºC | 370.0 | 96.6 | 3.1  (365 nm) | 2 |
| Au/ZnO | 20 bar CH4, 1 bar O2, 25 ºC | 12550.0 | 95.4 | 11.7  (368 nm) | 4 |
| Au-Pd/ZnO | 29 bar CH4, 1bar O2, 25 ºC | 8100.0 | 97.2 | 6.4  (365 nm) | 27 |
| Defective TiO2 | 1.9 MPa CH4, 0.1 MPa O2, 25 ºC | 362.0 | 93.1 | 7.96  (360 nm) | 28 |
| Au-Cu/ZnO | 20 bar CH4, 1 bar O2, 25 ºC | 11225.0 | 100.0 | 14.1  (365 nm) | 6 |
| Au/ZnO | 29 bar CH4, 1 bar O2, 25 ºC | 36400.0 | 100.0 | 3.8  (365 nm) | 29 |
| Pd/def-In2O3 | 1.9 MPa CH4, 0.1 MPaO2, 25 ºC | 2995.0 | 100.0 | 2.9  (420 nm) | 30 |
| Cu−W−TiO2 | 20 bar CH4, 2 bar O2, 30 ºC | 17250.0 | 97.1 | - | 31 |
| 90% Anatase TiO2 | 2.0 MPa CH4, 0.5 MPa O2, 25 ºC | 8090 | 97.4 | - | 32 |
| Fe-MOF | 1 atm CH4/O2 (1:1), 25 °C | 8810.0 | 100.0 | - | 33 |
| few-layered C3N4  (fl-CN) | 19 bar CH4, 1 bar O2, 25 °C | 1893.0 | 99.2 | - | 17 |
| AuPd/TiO2 | 30 bar CH4, 10 bar O2, 25 ºC | 20000.0 | 98.0 | - | 34 |
| CuOx/ZnO | 30 °C, 19 bar CH4, 1bar O2 | 21250.0 | 100.0 | - | 35 |

**Supplementary Table 6 (continued).** Performance comparison of photocatalytic CH4 oxidation with O2 over different photocatalysts.

| **Catalysts** | **Reaction conditions** | **Oxygenate yield**  **(μmol gcat-1 h-1)** | **Selectivity**  **(%)** | **AQY(%)** | **Ref** |
| --- | --- | --- | --- | --- | --- |
| Fe SA−NC/C3N4 | 1 bar O2, 19 bar CH4, 30 °C, 1 h | 5020 | 98.5 | - | 36 |
| Ag/TiO2 | 20 bar CH4, 1bar O2, 25 ºC | ~5400.0 | ~90.0 | - | 37 |
| Ga2O3 | 5 mL CH4, 40 ºC | 354.7 | 94.8 | - | 38 |
| ZnO/Fe2O3 | 1atm CH4, 25 ºC | 118.84 | 100.0 | - | 39 |
| 0.5Pd-ZnTi-LDH-A200 | 19 bar CH4,1 bar O2, 25 ºC | 4924.47 | 100.0 | - | 40 |
| Au/WO3 | 1.9 MPa CH4, 0.1 MPa O2, 25 ºC | 300.0 | 99 | - | 41 |

**Supplementary Table 7.** Average number of hydrogen bonds of water molecules in Au/TiO2 and Au/TiO2@pSiO2-X at different RH values.

| **Catalysts** | **Average number of H-bonds** | |
| --- | --- | --- |
| RH = 100% | RH = 8.9% |
| Au/TiO2 | 3.18 | - |
| Au/TiO2@pSiO2-3.1 | 3.02 | 2.98 |
| Au/TiO2@pSiO2-1.7 | 2.90 | 2.85 |

**Supplementary Note 1: O2 pressure dependence study**

O2 is known to plays a crucial role in photocatalytic CH4 oxidation. Compared to bare Au/TiO2, Au/TiO2@pSiO2-X offers a higher surface area due to its porous silica shell. Thus, one possible explanation for the high yields of liquid oxygenates and H2O2 is the enhanced O2 enrichment near Au/TiO2 interface, attributed to the increased surface area. However, the following findings invalidate this assumption.

We examined the effect of O2 partial pressure on catalytic performance for Au/TiO2 and Au/TiO2@pSiO2-X catalysts and their metal free counterparts (TiO2 and TiO2@pSiO2). If the nanoporous silica shell facilitated O2 enrichment in aqueous solutions, TiO2@pSiO2 would be expected to exhibit higher oxygenates and H2O2 production compared to TiO2; yet, however, the opposite was observed (Supplementary Fig. 14c, d). TiO2 achieved maximum oxygenates yield of 13.1 mmol g-1 h-1 at 0.21 MPa O2, with no further increase beyond this pressure. Conversely, TiO2@pSiO2-2.6 showed gradual increase in oxygenates yields with O2 pressure; however, even at 0.5 MPa, it only reached 2.58 mmol g-1 h-1, four times lower than bare TiO2. For Au/TiO2 and Au/TiO2@pSiO2-1.7, the porous SiO2 shell also requires a higher O2 pressure (1 MPa compared to 0.042 MPa) to achieve optimal yields (Supplementary Fig. 14a, b), which suggests that the hydrophilic silica channels hinder O2 transport rather than facilitate its enrichment. This is likely due to the competitive adsorption of water and oxygen in an aqueous solution, compounded by the capillary effect. Water molecules adsorb inside the silica pores, filling them with liquid water. In contrast to the easy transport of O2 gas through silica pores in the gas phase, the hydrophilic silica saturated with water makes it challenging for the hydrophobic O2 gas to permeate in an aqueous solution.

Depositing Au on TiO2 and TiO2@pSiO2 significantly improved product yields across all O2 pressures, underscoring the role of Au in enhancing O2 adsorption and activation. Only 0.042 MPa O2 is required to reach the maximum oxygenates yields for Au/TiO2, compared to 0.21 MPa for TiO2 (Supplementary Fig. 14a, c). The comparison between Au/TiO2@pSiO2 and TiO2@pSiO2 shows the similar trends (Fig. 2d, Supplementary Fig. 14d). Furthermore, moving Au from the TiO2 surface to the SiO2 surface, forming TiO2@pSiO2-Au catalyst, resulted in a fourfold reduction in CH4 conversion (Supplementary Fig. 16). This highlights the importance of the Au/TiO2 interface for effective O2 adsorption and activation in methane oxidation.

**Supplementary Note 2: Generalization of the confinement strategy**

1. Investigations with different metal co-catalysts

Similar enhancement trends were observed when Pt, Rh, or Pd were deposited as cocatalysts (Fig. 3a). Among these, the Pt/TiO2@pSiO2-1.7 catalyst exhibited the highest oxygenate production. This led us to further investigate Pt-based systems. We synthesized a series of Pt based catalysts with varying silica pore size, and the oxygenates yields followed the trend: Pt/TiO2@pSiO2-1.7 > Pt/TiO2@pSiO2-2.6 > Pt/TiO2@pSiO2-3.1 > Pt/TiO2 (Supplementary Fig. 22). In addition, Pt/TiO2@pSiO2 showed a significantly higher H2O2 production compared to Pt/TiO2, which did not produce any H2O2 (Fig. 3a, Supplementary Fig. 22).

We conducted in situ EPR and 18O isotope labeling experiment to identify key radicals and their formation pathway over Pt/TiO2@pSiO2. Consistent with previous findings on Au/TiO2@pSiO2, •OH radical production increased as silica pore size decreased, while •OOH radical production showed the opposite trend (Supplementary Fig. 38). The 18O isotope labeling experiment, using benzoic acid as an •OH radical trap, confirmed that for Pt/TiO2@pSiO2, •OH radicals primarily originate from H2O rather than O2 (Supplementary Fig. 39). In contrast, for Pt/TiO2, approximately half of the •OH radicals derive from H2O oxidation and the other half from O2 reduction (Supplementary Fig. 40). This observation is also consistent with what we observed for Au/TiO2@pSiO2 and Au/TiO2.

These results for Pt/TiO2@pSiO2 closely resemble those observed for Au/TiO2@pSiO2, not only in terms of oxygenate and H2O2 production but also in radical generation and their formation pathways. This similarity further suggests that the nanoporous confinement strategy is applicable across different noble metal cocatalysts.

1. Investigations with different oxide semiconductors

We also investigated the versatility of the confinement approach by replacing P25 TiO2 with anatase TiO2, BiVO4 and ZnO. Both BiVO4 and anatase TiO2 (A-TiO2), when coated with silica (Au/BiVO4@pSiO2 and Au/A-TiO2@pSiO2), showed notably enhanced CH4 conversion (Fig. 3a, and Supplementary Fig. 23-24) Specifically, Au/BiVO4@pSiO2-2.6 achieved oxygenate yields of 3.1 mmol g-1 h-1, which is 13 times higher than Au/BiVO4. Au/anatase TiO2@pSiO2 shows similar observation.

In the case of ZnO, we found that encapsulating ZnO with porous SiO2 significantly decreased its CH4 conversion rates (Supplementary Fig. 25a), likely due to ZnO dissolution in the ammonia solution used during SiO2 coating. This is supported by XRD analysis (Supplementary Fig. 25b), which shows broader and more noisy peaks for Au/ZnO@pSiO2-2.6 compared to Au/ZnO, indicating a reduced ZnO crystallite size after SiO2 coating.

**Supplementary Note 3: AQY calculation for CH4 conversion and H2O2 formation.**

In the photochemical CH4 oxidation with O2, CH4 is oxidized to various oxygenates, including CH3OOH, CH3OH, HCHO, HCOOH and CO2, primarily consuming holes. Meanwhile, O2 is reduced to H2O2 by consuming electrons, as supported by the 18O labeling experiments (Fig. 4f).

The reactions for CH4 oxidation to oxygenates are presented as follows:

1. H2O + h+ •OH + H+
2. CH4 + •OH •CH3 + H+
3. •CH3 + O2 CH3OO•
4. CH3OO• + e- + H+ CH3OOH
5. CH3OOH + 2e- + 2H+ CH3OH + H2O
6. CH3OH + 2•OH HCHO + H2O or CH3OH + 2h+ HCHO + 2H+
7. HCHO + 0.5O2 + 2h+ HCOOH
8. HCHO + O2 + 4h+ CO2 + H2O

The reactions for O2 reduction to H2O2 is

1. O2 + 2e- + 2H+ H2O2

Given these reactions, we can calculate the AQY based on two processes: CH₄ oxidation, which primarily involves the consumption of holes, and O2 reduction, which reflects the consumption of electrons. The AQY value at monochromatic wavelength of 365 nm was calculated according to the following equation:

where *N(used photons)* and *N(incident photons)* represent the number of photogenerated charges and the number of incident photons, respectively. *N(photons)* = IAt/E, where I, A, t and E represent incident light 𝜆 intensity (W/cm2), irradiation area (cm2), light incident time (s) and photo energy (J), respectively.

For CH4 oxidation to oxygenates, *N(used photons)* = n(CH3OOH) + 3n(CH3OH) + 5n(HCHO) + 7n(HCOOH) + 9n(CO2), where n(CH3OOH), n(CH3OH), n(HCHO), n(HCOOH) and n(CO2) represent the mole numbers of produced CH3OOH, CH3OH, HCHO, HCOOH and CO2, respectively. For O2 reduction to H2O2, *N(used photons) =* 2n(H2O2). The calculated AQY for CH4 oxidation to oxygenates and AQY for H2O2 generation over different photocatalyst are presented in Supplementary Fig. 37 and Supplementary Table 4.

By comparing the AQY from CH4 oxidation to oxygenates, which primarily consumes holes, and O2 reduction to H2O2, which consumed electrons, we could calculate the selectivity of H2O2 across different photocatalysts using the formula: H2O2 selectivity (%) = AQY (H2O2 generation)/AQY (CH4 oxidation) 100%.

**Supplementary Note 4: H/D exchange between CH4 and D2O during KIE measurement**

For the overall CH4 oxidation to oxygenates, we observed a decrease in KIE over time for Au/TiO2@pSiO2-1.7, likely due to H/D exchange between CH4 and D2O during reactions:

1. D2O + h+ 🡪 •OD + D+
2. O2 + 2e- + 2D+ 🡪 D2O2
3. CH4 + •OD 🡪 •CD3 + HDO
4. •CH3 + O2 + e- + D+ 🡪 CH3OOD
5. CH3OOD + 2e- + 2D+ 🡪 CH3OD + D2O
6. CH3OD + •OD 🡪 •CH2OD + HDO
7. •CH2OD + •OD 🡪 DOCH2OD 🡪 HCDO + HDO
8. HCDO + O2 + 4h+ 🡪 CO2 + HDO

**Supplementary References**

- 1. Song, H. *et al.* Selective Photo-oxidation of Methane to Methanol with Oxygen over Dual-Cocatalyst-Modified Titanium Dioxide. *ACS Catalysis* **10**, 14318-14326, doi:10.1021/acscatal.0c04329 (2020).
  2. Fan, Y. *et al.* Selective photocatalytic oxidation of methane by quantum-sized bismuth vanadate. *Nature Sustainability* **4**, 509-515, doi:10.1038/s41893-021-00682-x (2021).
  3. Agarwal, N. *et al.* Aqueous Au-Pd colloids catalyze selective CH4 oxidation to CH3OH with O2 under mild conditions. *Science* **358**, 223-227, doi:10.1126/science.aan6515 (2017).
  4. Song, H. *et al.* Direct and Selective Photocatalytic Oxidation of CH4 to Oxygenates with O2 on Cocatalysts/ZnO at Room Temperature in Water. *Journal of the American Chemical Society* **141**, 20507-20515, doi:10.1021/jacs.9b11440 (2019).
  5. Xie, C. *et al.* Transport Mediating Core–Shell Photocatalyst Architecture for Selective Alkane Oxidation. *Nano Letters* **23**, 2039-2045, doi:10.1021/acs.nanolett.2c04567 (2023).
  6. Luo, L. *et al.* Binary Au–Cu Reaction Sites Decorated ZnO for Selective Methane Oxidation to C1 Oxygenates with Nearly 100% Selectivity at Room Temperature. *Journal of the American Chemical Society* **144**, 740-750, doi:10.1021/jacs.1c09141 (2022).
  7. Liu, B., Zhang, W., Zhang, Q., Guan, Y. & Lu, Z. Synergistic Promotion of the Photocatalytic Preparation of Hydrogen Peroxide (H2O2) from Oxygen by Benzoxazine and Si─O─Ti Bond. *Small* **19**, 2303907, doi:https://doi.org/10.1002/smll.202303907 (2023).
  8. Chu, C. *et al.* Electronic Tuning of Metal Nanoparticles for Highly Efficient Photocatalytic Hydrogen Peroxide Production. *ACS Catalysis* **9**, 626-631, doi:10.1021/acscatal.8b03738 (2019).
  9. Wang, L. *et al.* Simultaneous hydrogen and peroxide production by photocatalytic water splitting. *Chinese Journal of Catalysis* **40**, 470-475, doi:https://doi.org/10.1016/S1872-2067(19)63274-2 (2019).
  10. Hong, Y. *et al.* Unassisted photocatalytic H2O2 production under visible light by fluorinated polymer-TiO2 heterojunction. *Chemical Engineering Journal* **418**, 129346, doi:https://doi.org/10.1016/j.cej.2021.129346 (2021).
  11. Zhai, L. *et al.* Constructing Synergistic Triazine and Acetylene Cores in Fully Conjugated Covalent Organic Frameworks for Cascade Photocatalytic H2O2 Production. *Chemistry of Materials* **34**, 5232-5240, doi:10.1021/acs.chemmater.2c00910 (2022).
  12. Li, L., Xu, L., Hu, Z. & Yu, J. C. Enhanced Mass Transfer of Oxygen through a Gas–Liquid–Solid Interface for Photocatalytic Hydrogen Peroxide Production. *Advanced Functional Materials* **31**, 2106120, doi:https://doi.org/10.1002/adfm.202106120 (2021).
  13. Zhi, Q. *et al.* Piperazine-Linked Metalphthalocyanine Frameworks for Highly Efficient Visible-Light-Driven H2O2 Photosynthesis. *Journal of the American Chemical Society* **144**, 21328-21336, doi:10.1021/jacs.2c09482 (2022).
  14. Das, P. *et al.* Integrating Bifunctionality and Chemical Stability in Covalent Organic Frameworks via One-Pot Multicomponent Reactions for Solar-Driven H2O2 Production. *Journal of the American Chemical Society* **145**, 2975-2984, doi:10.1021/jacs.2c11454 (2023).
  15. Liao, Q. *et al.* Regulating Relative Nitrogen Locations of Diazine Functionalized Covalent Organic Frameworks for Overall H2O2 Photosynthesis. *Angewandte Chemie International Edition* **62**, e202310556, doi:https://doi.org/10.1002/anie.202310556 (2023).
  16. Liu, R. *et al.* Linkage-engineered donor–acceptor covalent organic frameworks for optimal photosynthesis of hydrogen peroxide from water and air. *Nature Catalysis* **7**, 195-206, doi:10.1038/s41929-023-01102-3 (2024).
  17. Feng, B. *et al.* Tailored Exfoliation of Polymeric Carbon Nitride for Photocatalytic H2O2 Production and CH4 Valorization Mediated by O2 Activation. *Angewandte Chemie International Edition* **63**, e202401884, doi:https://doi.org/10.1002/anie.202401884 (2024).
  18. Teng, Z. *et al.* Atomically dispersed antimony on carbon nitride for the artificial photosynthesis of hydrogen peroxide. *Nature Catalysis* **4**, 374-384, doi:10.1038/s41929-021-00605-1 (2021).
  19. Isaka, Y., Kawase, Y., Kuwahara, Y., Mori, K. & Yamashita, H. Two-Phase System Utilizing Hydrophobic Metal–Organic Frameworks (MOFs) for Photocatalytic Synthesis of Hydrogen Peroxide. *Angewandte Chemie International Edition* **58**, 5402-5406, doi:https://doi.org/10.1002/anie.201901961 (2019).
  20. Liu, T. *et al.* Overall photosynthesis of H2O2 by an inorganic semiconductor. *Nature Communications* **13**, 1034, doi:10.1038/s41467-022-28686-x (2022).
  21. Luo, L. *et al.* Nearly 100% selective and visible-light-driven methane conversion to formaldehyde via. single-atom Cu and Wδ+. *Nature Communications* **14**, 2690, doi:10.1038/s41467-023-38334-7 (2023).
  22. Jiang, Y. *et al.* Enabling Specific Photocatalytic Methane Oxidation by Controlling Free Radical Type. *Journal of the American Chemical Society* **145**, 2698-2707, doi:10.1021/jacs.2c13313 (2023).
  23. Zhang, R. *et al.* Direct Photocatalytic Methane Oxidation to Formaldehyde by N Doping Co-Decorated Mixed Crystal TiO2. *ACS Nano* **18**, 12994-13005, doi:10.1021/acsnano.4c01318 (2024).
  24. Song, H. *et al.* Atomically Dispersed Nickel Anchored on a Nitrogen-Doped Carbon/TiO2 Composite for Efficient and Selective Photocatalytic CH4 Oxidation to Oxygenates. *Angewandte Chemie International Edition* **62**, e202215057, doi:https://doi.org/10.1002/anie.202215057 (2023).
  25. Ding, J. *et al.* Asymmetrically coordinated cobalt single atom on carbon nitride for highly selective photocatalytic oxidation of CH4 to CH3OH. *Chem* **9**, 1017-1035, doi:https://doi.org/10.1016/j.chempr.2023.02.011 (2023).
  26. Gong, H. *et al.* Selective Photocatalytic Aerobic Oxidation of Methane to Methyl Hydroperoxide by ZnO-Loaded Single-Atomic Ruthenium Oxide Catalyst. *Journal of the American Chemical Society* **147**, 9134-9146, doi:10.1021/jacs.4c11685 (2025).
  27. Zhou, Q. *et al.* Selective Photocatalytic Oxidation of Methane to Methanol by Constructing a Rapid O2 Conversion Pathway over Au–Pd/ZnO. *ACS Catalysis* **14**, 955-964, doi:10.1021/acscatal.3c04374 (2024).
  28. Luo, P.-P., Zhou, X.-K., Li, Y. & Lu, T.-B. Simultaneously Accelerating Carrier Transfer and Enhancing O2/CH4 Activation via Tailoring the Oxygen-Vacancy-Rich Surface Layer for Cocatalyst-Free Selective Photocatalytic CH4 Conversion. *ACS Applied Materials & Interfaces* **14**, 21069-21078, doi:10.1021/acsami.2c03671 (2022).
  29. Zhou, Q. *et al.* Selective photocatalytic oxidation of methane to C1 oxygenates by regulating sizes and facets over Au/ZnO. *Nano Research* **17**, 3810-3818, doi:10.1007/s12274-023-6323-5 (2024).
  30. Luo, L. *et al.* Synergy of Pd atoms and oxygen vacancies on In2O3 for methane conversion under visible light. *Nature Communications* **13**, 2930, doi:10.1038/s41467-022-30434-0 (2022).
  31. Huang, M. *et al.* Selective Photocatalytic Oxidation of Methane to Oxygenates over Cu–W–TiO2 with Significant Carrier Traps. *ACS Catalysis* **12**, 9515-9525, doi:10.1021/acscatal.2c02424 (2022).
  32. Jiang, Y. *et al.* Elevating Photooxidation of Methane to Formaldehyde via TiO2 Crystal Phase Engineering. *Journal of the American Chemical Society* **144**, 15977-15987, doi:10.1021/jacs.2c04884 (2022).
  33. An, B. *et al.* Direct photo-oxidation of methane to methanol over a mono-iron hydroxyl site. *Nature Materials* **21**, 932-938, doi:10.1038/s41563-022-01279-1 (2022).
  34. Cai, X., Fang, S. & Hu, Y. H. Unprecedentedly high efficiency for photocatalytic conversion of methane to methanol over Au–Pd/TiO2 – what is the role of each component in the system? *Journal of Materials Chemistry A* **9**, 10796-10802, doi:10.1039/D1TA00420D (2021).
  35. Cui, Y. *et al.* Largely Promoted C–H Activation in Methane with O2 via d-Orbital Hybridization Induced by CuOx Supported on ZnO. *ACS Catalysis* **15**, 1607-1615, doi:10.1021/acscatal.4c06051 (2025).
  36. Xu, Y. *et al.* Iron Oxide Clusters as Electron Donors Under Light Enhance Oxygen Reduction Kinetics at Atomically Dispersed Fe for Photocatalytic CH4 Partial Oxidation. *Angewandte Chemie International Edition* **64**, e202419075, doi:https://doi.org/10.1002/anie.202419075 (2025).
  37. Feng, N. *et al.* Efficient and selective photocatalytic CH4 conversion to CH3OH with O2 by controlling overoxidation on TiO2. *Nature Communications* **12**, 4652, doi:10.1038/s41467-021-24912-0 (2021).
  38. Han, C. *et al.* Selective Cleavage of Chemical Bonds in Targeted Intermediates for Highly Selective Photooxidation of Methane to Methanol. *Journal of the American Chemical Society* **145**, 8609-8620, doi:10.1021/jacs.3c01317 (2023).
  39. Zheng, K. *et al.* Room-Temperature Photooxidation of CH4 to CH3OH with Nearly 100% Selectivity over Hetero-ZnO/Fe2O3 Porous Nanosheets. *Journal of the American Chemical Society* **144**, 12357-12366, doi:10.1021/jacs.2c03866 (2022).
  40. Fu, L. *et al.* Highly Selective Conversion of CH4 to High Value-Added C1 Oxygenates over Pd Loaded ZnTi-LDH. *Advanced Energy Materials* **13**, 2301118, doi:https://doi.org/10.1002/aenm.202301118 (2023).
  41. Wei, S. *et al.* Aerobic oxidation of methane to formaldehyde mediated by crystal-O over gold modified tungsten trioxide via photocatalysis. *Applied Catalysis B: Environmental* **283**, 119661, doi:https://doi.org/10.1016/j.apcatb.2020.119661 (2021).
